# Supplementary material
Source: Royal Society of Chemistry journal article supplement (doi:10.1039/d6ta01798c)
Supplement: d6ta01798c1.pdf [file d6ta01798c1.pdf]

## Supporting Information

### Polyaromatic Hydrocarbon based 3D Coordination Polymeric Materials: Synergistic Effect of Nickel (II) Nitrate and Tetraalkynyl Anthracene Towards Electrocatalytic Hydrogen Production

Niharika Tanwar,<sup>a</sup> Jumana Ishrat,<sup>b</sup> Khadimul Islam,<sup>b</sup> Kalishankar Bhattacharyya,<sup>\*a</sup> Akshai Kumar<sup>\*a,b</sup>

<sup>a</sup> Centre for Nanotechnology, Indian Institute of Technology Guwahati, Guwahati, 781039, Assam, India

<sup>b</sup> Department of Chemistry, Indian Institute of Technology Guwahati, Guwahati, 781039, Assam, India.

Email: [akshaikumar@iitg.ac.in](mailto:akshaikumar@iitg.ac.in)

#### Table of Contents

| Contents |                                      | Page    |
|----------|--------------------------------------|---------|
| 1.       | Synthesis and Methodology            | S1- S3  |
| 2.       | Characterizations                    | S3-S4   |
| 3.       | Electrocatalytic activities          | S4-S8   |
| 4.       | Determination of Faradaic Efficiency | S8-S9   |
| 5.       | Mechanistic studies                  | S9-S10  |
| 6.       | Post Catalytic Characterizations     | S11     |
| 7.       | Control Studies                      | S12-S14 |
| 8.       | DFT studies                          | S15-S53 |
| 9.       | Literature survey                    | S54     |
| 10.      | References                           | S55     |

#### 1. Synthesis and Methodology

##### *Synthesis of Ni(OH)<sub>2</sub> nanoparticles*

Nickel hydroxide nanoparticles were synthesized by treating 1 M Ni(NO<sub>3</sub>)<sub>2</sub>·6H<sub>2</sub>O dissolved in 20 mL distilled water with 2 mL of 2 M NaOH solution dropwise. The precipitates were formed instantly and were washed with distilled water 5 × 10 minutes at 10,000 rpm to remove unreacted nitrate.

### **Method S1. Calculation of Faradaic efficiency**

Charge passed in the CA experiment for HER= x C

$$\text{Theoretical amount of H}_2 = \frac{x C}{96485 \times 2C} \text{ mol} = y \text{ mmol}$$

$$\left( 22.4 \frac{\text{mL}}{\text{mmol}} \times y \right) = z \text{ mL}$$

Amount of H<sub>2</sub> observed through eudiometric technique = a mL

$$\% \text{ of Faradaic efficiency} = \frac{\text{Experimentally observed volume of H}_2}{\text{Theoretical volume of H}_2} = \frac{a}{z} \times 100 = b \% \quad \dots (\text{S1})$$

### **Conversion of $E_{(Ag/AgCl)}$ to $E_{RHE}$**

$$E_{RHE} = 0.222 + 0.0591(\text{pH}) + E_{Ag/AgCl}, \text{ pH} = 0.301 \quad \dots (\text{S2})$$

### **Method S2. Inductively coupled plasma-mass spectroscopy (ICP-MS):**

Inductively coupled plasma-mass spectroscopy (ICP-MS) instrument (Make: Agilent, Model: 7850 ICP-MS, USA) was used for a quantitative analysis of Nickel % loading in **3D-CPM-a**. An initial acid hydrolysis of the material is done in 7 mL nitric acid + 3 mL distilled water in a microwave digester (Make: Milestone, Model: ETHOS EASY – advanced microwave digestion system, USA). After digestion, the solution was diluted upto 50 mL distilled water to get a stock solution. During analysis 1 mL was taken from the stock solution and diluted further by ten times.

Concentration of an element (metal) in the sample = 871.176 ppb

Dilution factor = 10

$$871.1 \times 10 = 8711 \text{ ppb} = \frac{8711 \text{ ppb}}{1000} = 8.711 \text{ mg/mL}$$

Total Volume of stock solution = 50 mL

$$\text{Total metal concentration} = 8.711 \text{ mg/mL} \times \frac{50 \text{ mL}}{1000} = 0.435 \text{ mg}$$

Amount of sample taken = 5 mg

$$\text{Mass \% of element} = \frac{0.435 \text{ mg}}{5 \text{ mg}} \times 100 = 8.71\%$$

$$\text{Mass \%} = \left( \frac{\left( \frac{(\text{Concentration of metal in ppb}) \times \text{Dilution factor}}{1000} \right) \left( \frac{\text{Total volume of sample in mL}}{1000} \right)}{(\text{Weight of sample taken in mg})} \right) \times 100 \quad \dots (\text{S3})$$

**Table S1. Comparison of theoretical mass % of elements present in PPP and Fe<sub>3</sub>O<sub>4</sub> PPP with mass % obtained from XPS and ICP-MS**

| Entry | Catalyst        | Elements | Theoretical <sup>a</sup><br>(%) | Normalized <sup>a</sup><br>(%) | XPS <sup>b</sup><br>(%) | XPS <sup>c</sup><br>(%) | ICP-MS <sup>d</sup><br>(%) |
|-------|-----------------|----------|---------------------------------|--------------------------------|-------------------------|-------------------------|----------------------------|
| 1     | <b>3D-CPM-a</b> | C        | 56                              | 59                             | 54                      | 53                      | -                          |
| 2     |                 | N        | 4                               | 4                              | 5                       | 5                       | -                          |
| 3     |                 | O        | 28                              | 30                             | 33                      | 36                      | -                          |
| 4     |                 | Ni       | 7                               | 8                              | 8                       | 7                       | 8.7                        |

The theoretical mass % of elements was calculated from Chemdraw and was normalized only for C, N and O, <sup>b</sup> About 10 mg of sample was used for XPS analysis measured using PHI 5000 Versa Probe III instrument, <sup>c</sup> XPS analysis measured after 15 h of HER for **3D-CPM-a** using PHI 5000 Versa Probe III instrument <sup>d</sup> ICP-MS was used to detect the mass % of Ni in **3D-CPM-a** carried out in an Agilent, Model: 7850 ICP-MS instrument.

## 2. Characterizations

### X-ray Diffraction Analysis

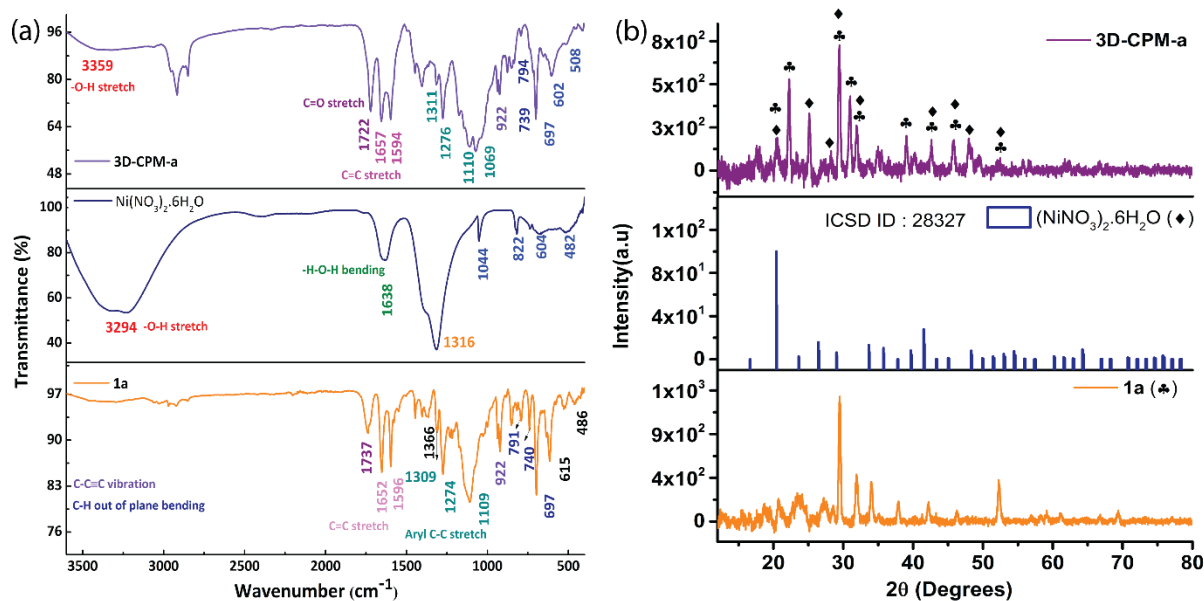

**Figure S1** (a) Comparative FT-IR plot of **1a**, Ni(NO<sub>3</sub>)<sub>2</sub>·6H<sub>2</sub>O and **3D-CPM-a** (b) Thin-film XRD of **1a**, Ni(NO<sub>3</sub>)<sub>2</sub>·6H<sub>2</sub>O and **3D-CPM-a** carried out using a Rigaku SmartLab diffractometer utilizing Cu K $\alpha$  radiation ( $\lambda = 1.541 \text{ \AA}$ ) at 40 kV and 125 mA. The  $2\theta$  angular region between 10° and 80° was explored at a scan rate of 5-10°/min in a continuous scan mode.

## Electron Paramagnetic Resonance

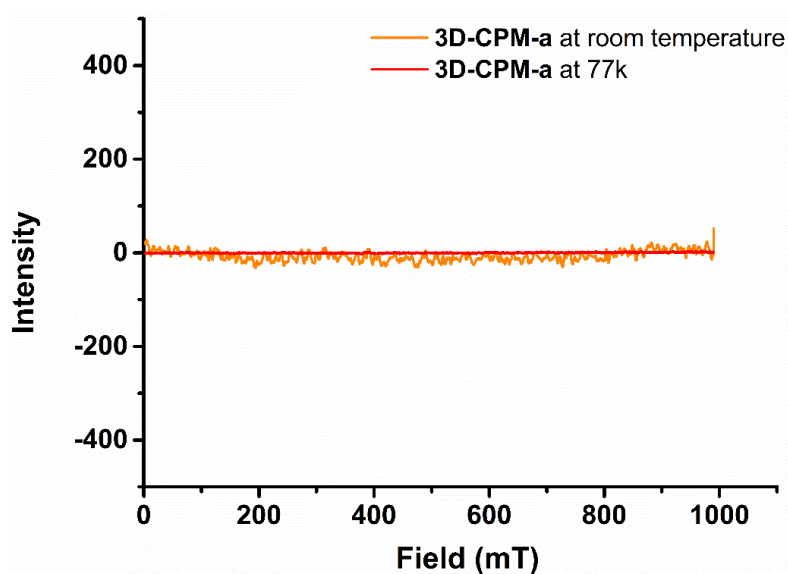

**Figure S2** EPR spectrum of **3D-CPM-a** carried out in a JES-FA 200 ESR spectrometer at room temperature as well as in a liquid  $N_2$ .

## 3. Electrochemical Studies

### Cyclic Voltammetry for Activation of Working Electrode

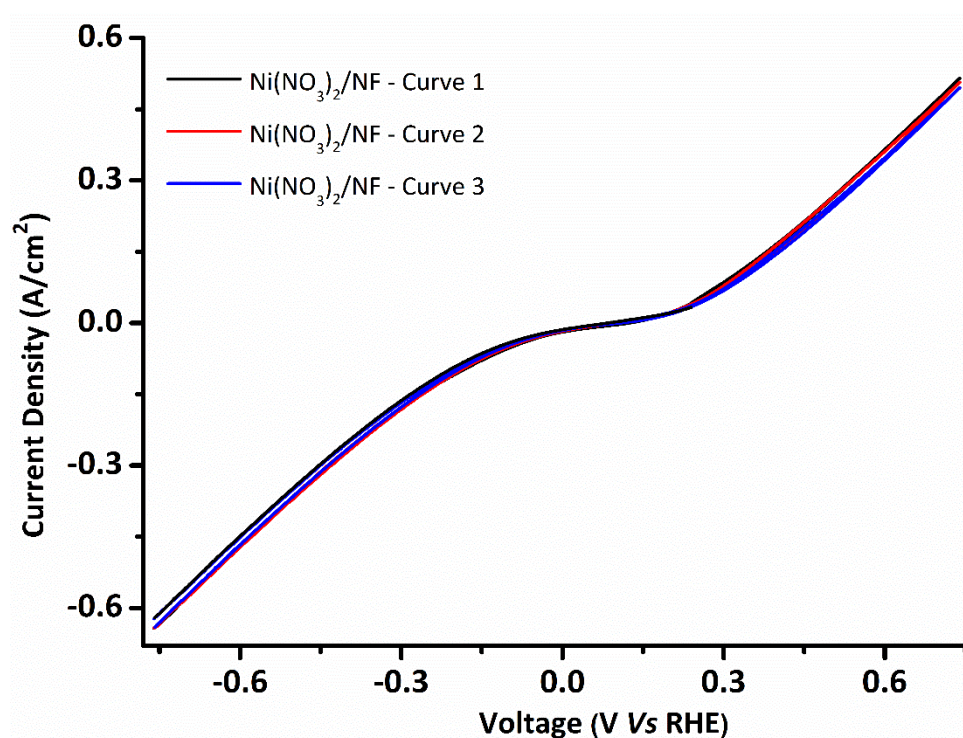

**Figure S3** Cyclic voltammetry curves of  $Ni(NO_3)_2/NF$  at  $90^\circ C$  performed at  $50\text{ mV/s}$  scan rate in a potential range of  $-0.76\text{ V}$  to  $0.74\text{ V}$  Vs RHE

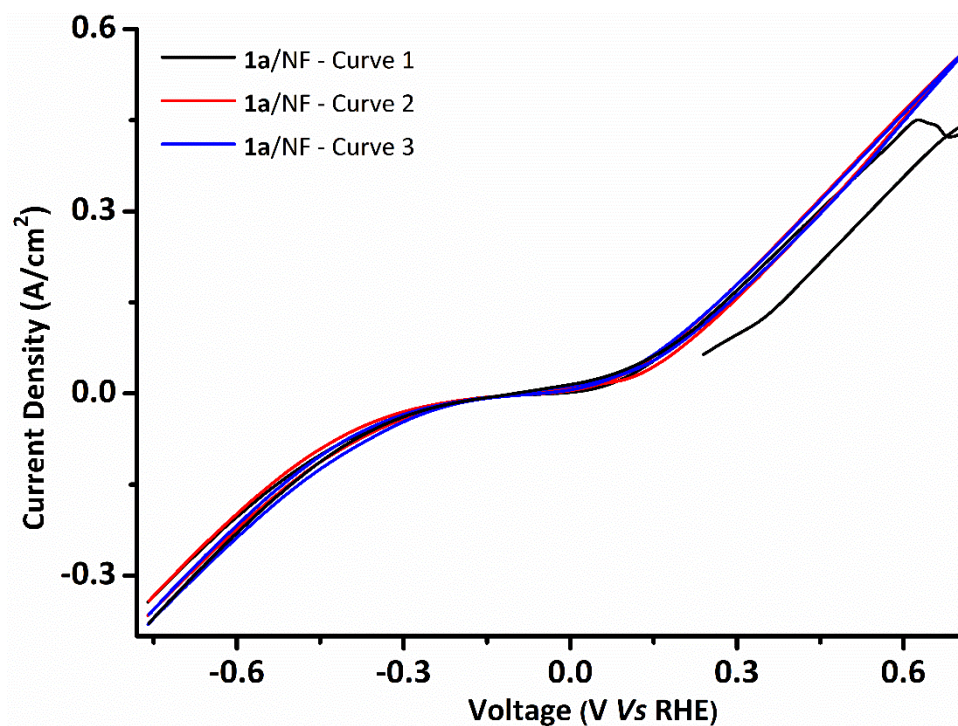

**Figure S4** Cyclic voltammety curves of 1a/NF at 90°C performed at 50 mV/s scan rate in a potential range of -0.76 V to 0.74 V Vs RHE

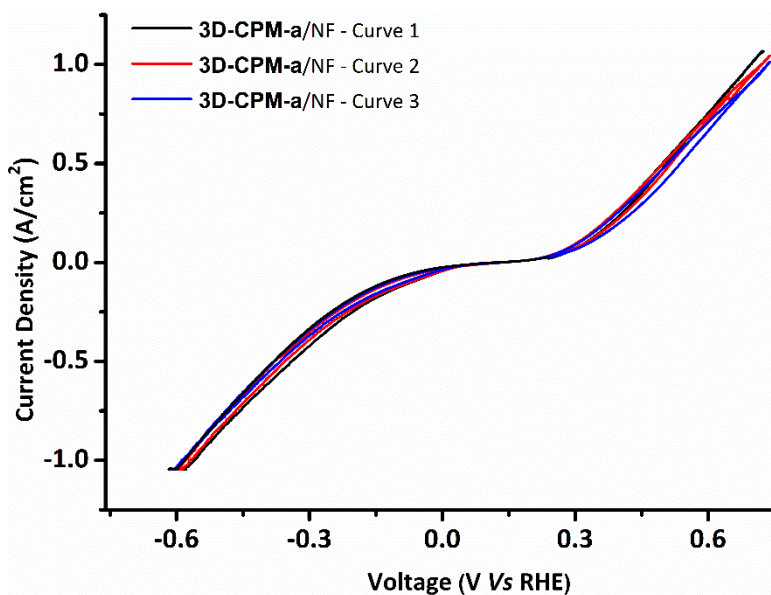

**Figure S5** Cyclic voltammety curves of 3D-CPM-a/NF at 90°C performed at 50 mV/s scan rate in a potential range of -0.76 V to 0.74 V Vs RHE

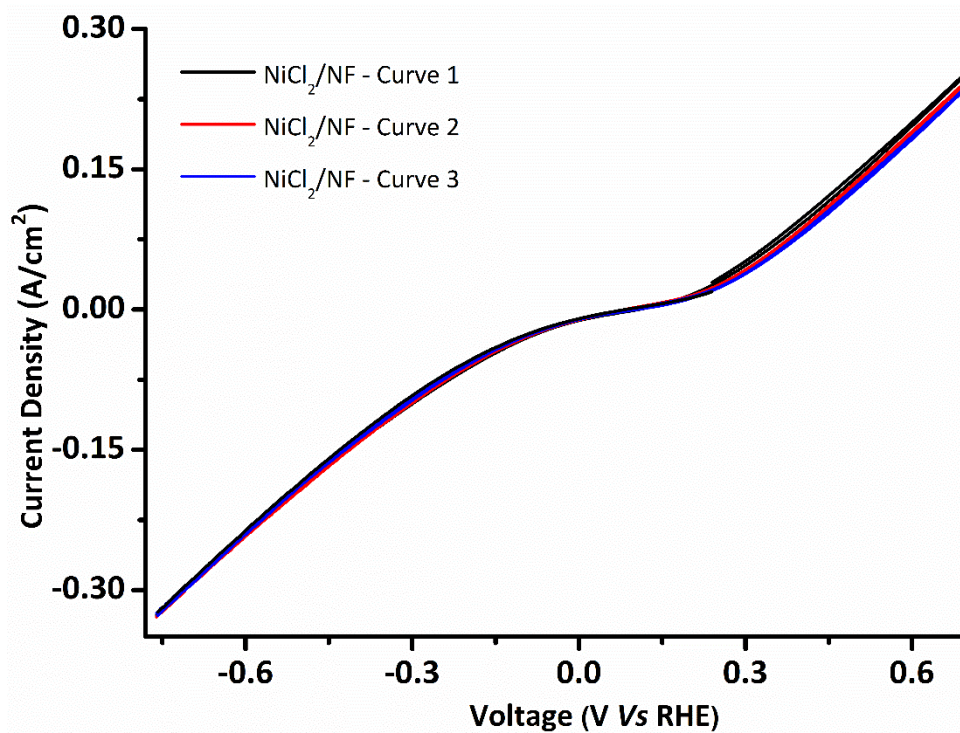

**Figure S6** Cyclic voltammetry curves of NiCl<sub>2</sub>/NF at 90°C performed at 50 mV/s scan rate in a potential range of -0.76 V to 0.74 V Vs RHE

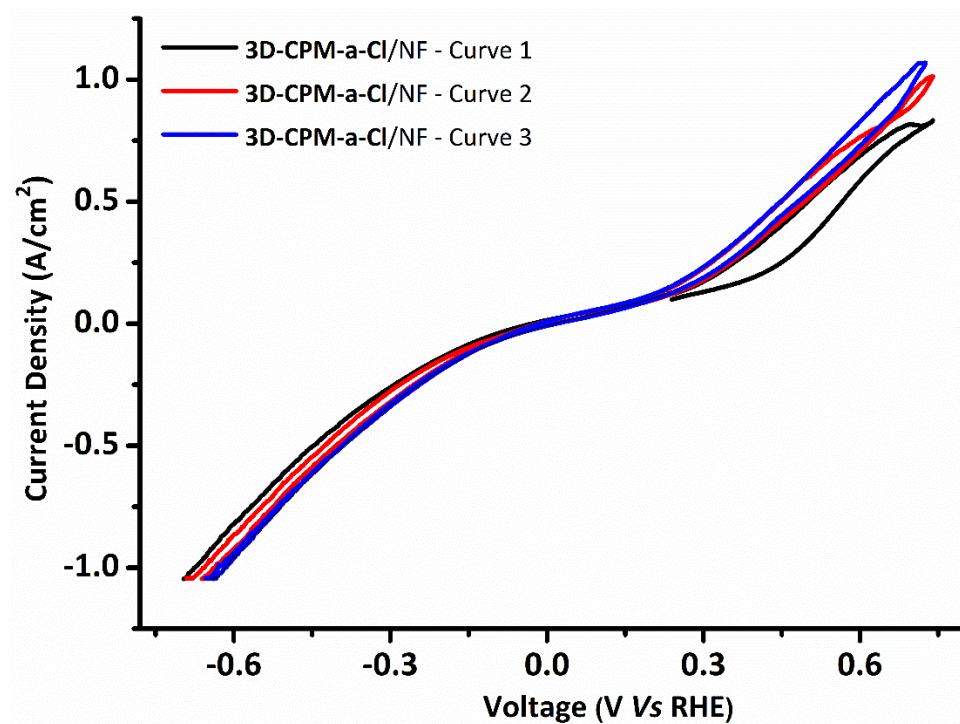

**Figure S7** Cyclic voltammetry curves of 3D-CPM-a-Cl/NF at 90°C performed at 50 mV/s scan rate in a potential range of -0.76 V to 0.74 V Vs RHE

### Linear Sweep Voltammetry for HER

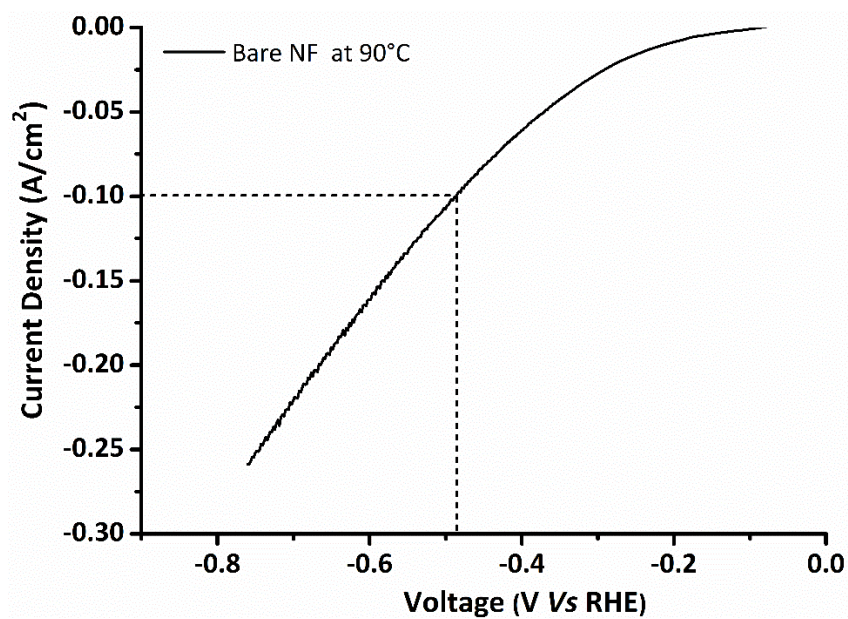

Figure S8 Linear sweep voltammetric plot for HER in 0.5 M H<sub>2</sub>SO<sub>4</sub> using bare NF at 90°C performed at 10 mV/s.

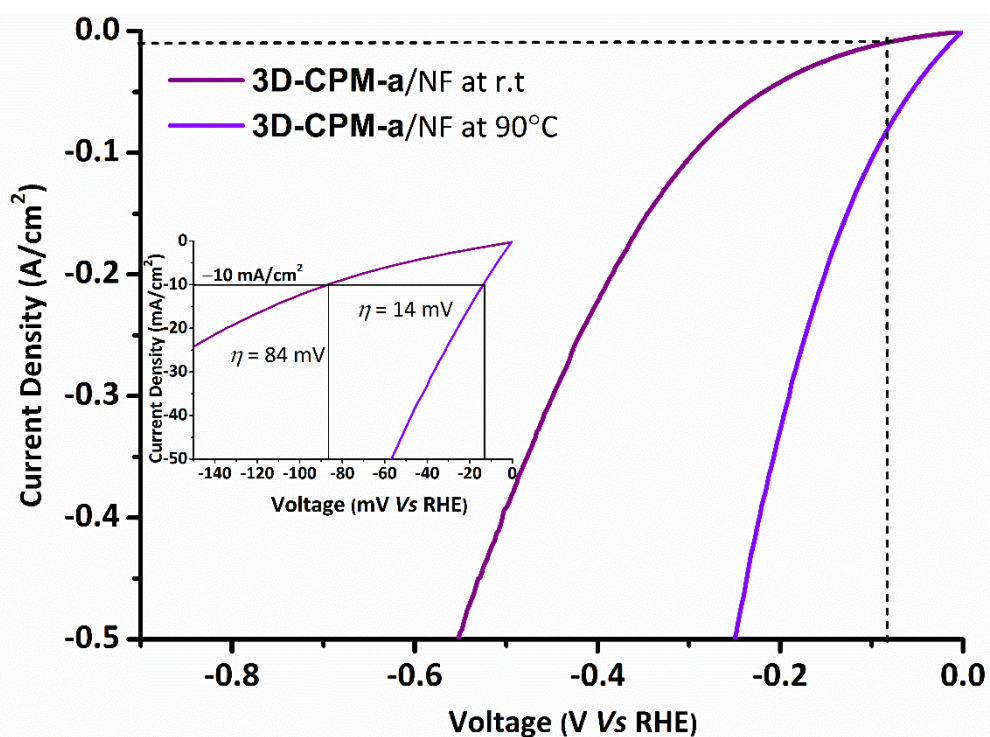

Figure S9 Linear sweep voltammetric plot for HER in 0.5 M H<sub>2</sub>SO<sub>4</sub> using 3D-CPM-a/NF at room temperature and at 90°C performed at 10 mV/s.

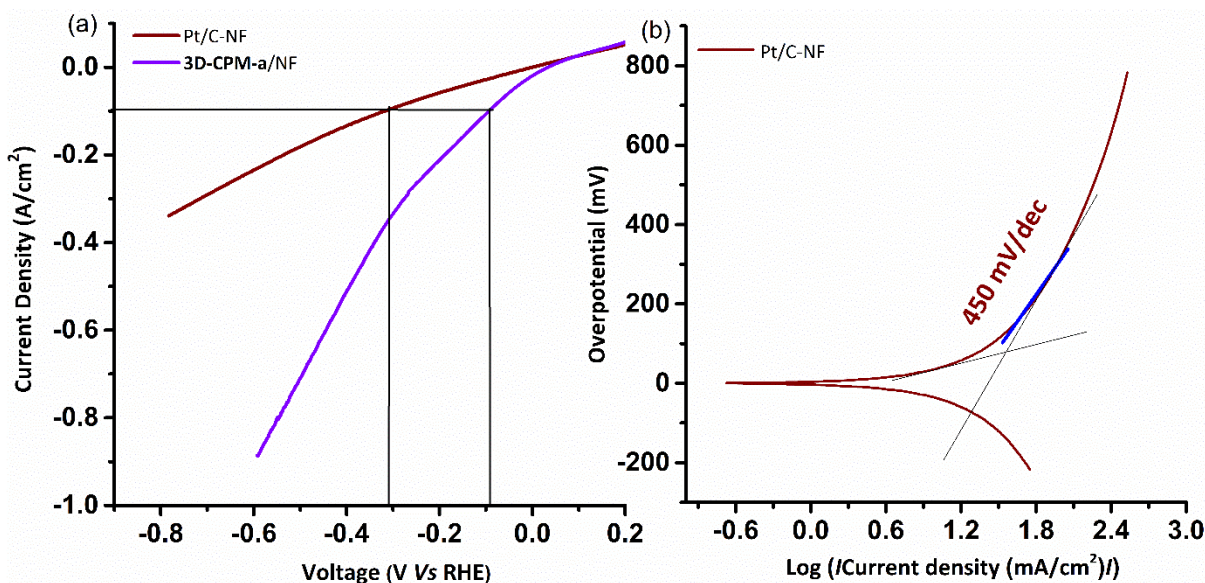

**Figure S10** (a) Linear sweep voltammetric plot for HER in 0.5 M H<sub>2</sub>SO<sub>4</sub> using 3D-CPM-a/NF in comparison with Pt/C on NF at 90°C performed at 10 mV/s (b) Tafel plot for Pt/C (40 wt% Pt) at 90°C in 0.5 M H<sub>2</sub>SO<sub>4</sub>.

#### 4. Determination of Faradaic Efficiency

A eudiometric technique was used to quantify the hydrogen generated during the reaction and the hydrogen was collected in a water column through water displacement technique. In this respect, chronoamperometry experiment was run with 3D-CPM-a/NF (activated) for 0.6 hours at a constant potential of  $-0.16$  V Vs RHE. The Faradaic efficiency was calculated according to method S1

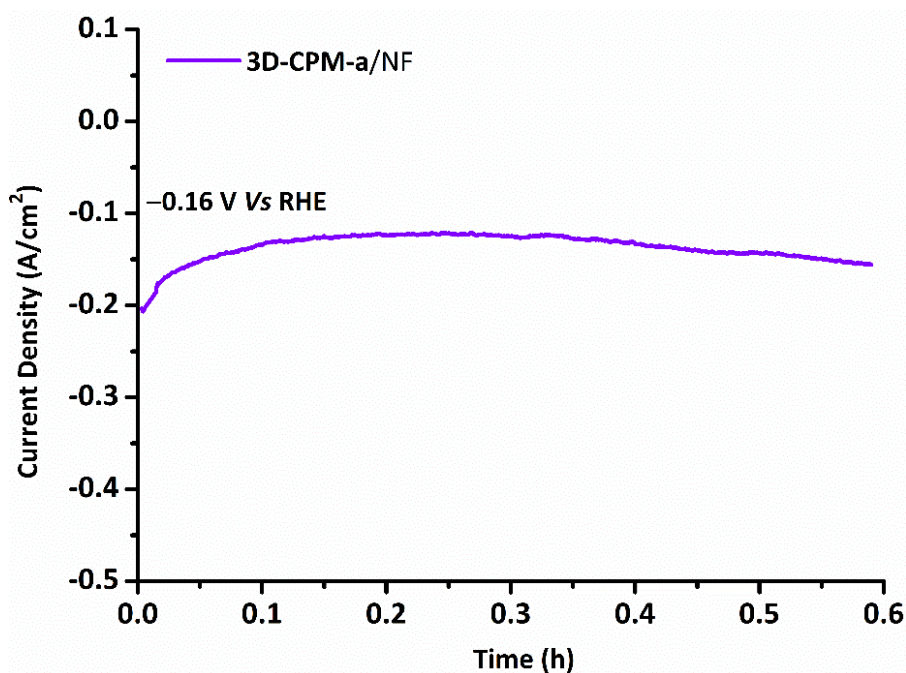

**Figure S11** Chronoamperometric plot for HER in 0.5 M H<sub>2</sub>SO<sub>4</sub> using 3D-CPM-a/NF at constant potential of  $-0.160$  V Vs RHE at 90°C for 2200 s on an activated NF.

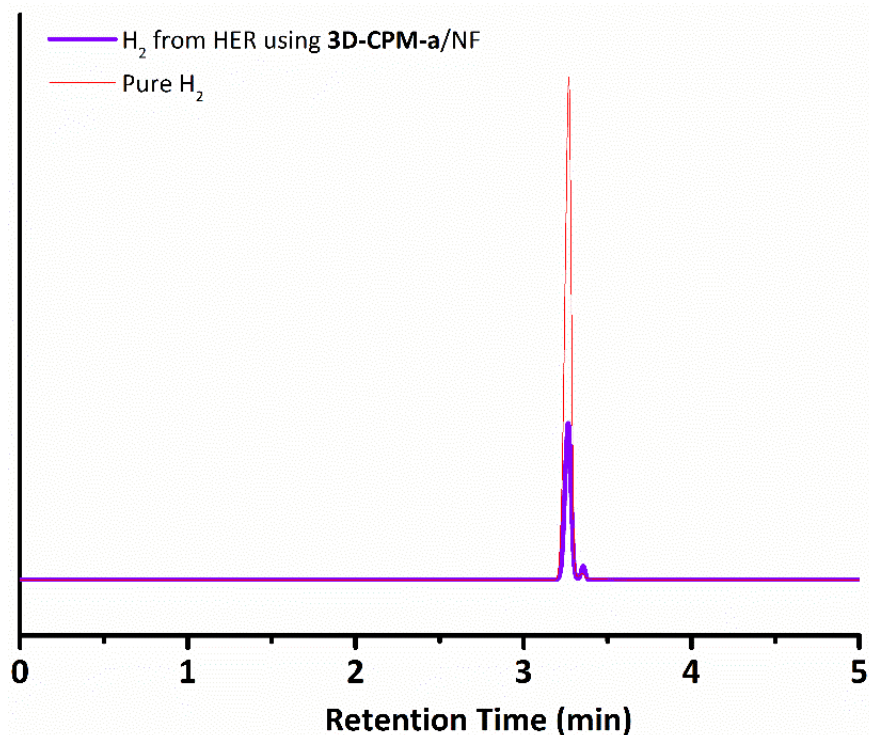

**Figure S12** GC-FID file analysis of H<sub>2</sub> evolved from HER using **3D-CPM-a/NF** at constant potential of -0.160 V Vs RHE at 90°C for 2200 s on an activated NF. Fresh sample of pure H<sub>2</sub> was also injected as reference sample.

## 5. Mechanistic Studies

### *Electrochemical Active Surface Area*

The electrochemical active surface area (ECSA) of **1a/NF**, Ni(NO<sub>3</sub>)<sub>2</sub>/NF, **3D-CPM-a-Cl/NF** and **3D-CPM-a/NF** was measured by performing cyclic voltammetry in a non-faradaic region (0.04 V to 0.24 V Vs RHE) at varied scan rates of 100 mV/s to 500 mV/s in 0.5 M H<sub>2</sub>SO<sub>4</sub> as the electrolyte at 90°C. Across an open-circuit voltage/centre voltage of 0.215 V for **1a/NF** and Ni(NO<sub>3</sub>)<sub>2</sub>/NF and 0.065 V for **3D-CPM-a-Cl/NF** and **3D-CPM-a/NF**, a current density vs scan rate plot was generated for all the four catalysts. The slope of the linear plot obtained, represents the double layer capacitance (C<sub>dl</sub>) for varied catalysts.

The electrochemical active area was determined using the formula

$$ECSA = C_{dl} / C_s$$

where C<sub>s</sub> is considered as 0.04 mF/cm<sup>2</sup> for 0.5 M H<sub>2</sub>SO<sub>4</sub> electrolyte.

### Determination of ECSA

| Catalysts                             | C <sub>dl</sub> (mF) | ECSA (cm <sup>2</sup> ) |
|---------------------------------------|----------------------|-------------------------|
| <b>1a/NF</b>                          | 9                    | 225                     |
| Ni(NO <sub>3</sub> ) <sub>2</sub> /NF | 4.5                  | 113                     |
| <b>3D-CPM-a-Cl/NF</b>                 | 47                   | 1200                    |
| <b>3D-CPM-a/NF</b>                    | 90                   | 2300                    |

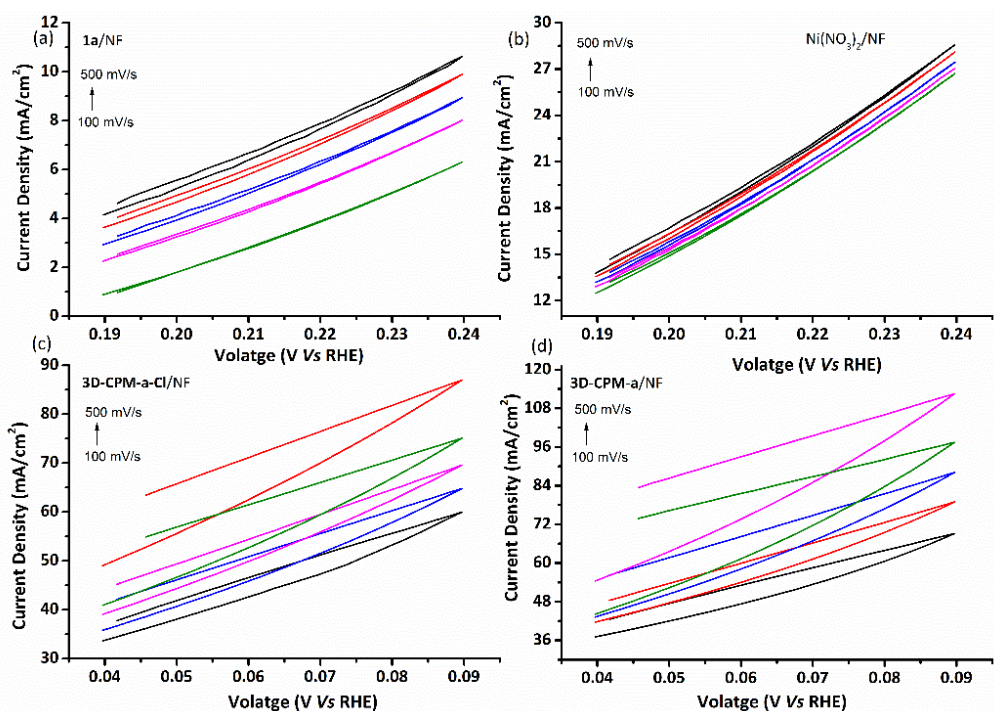

**Figure S13** CV curves of (a) **1a/NF** (b)  $\text{Ni}(\text{NO}_3)_2/\text{NF}$  (c) **3D-CPM-a-Cl/NF** and (d) **3D-CPM-a/NF** in 0.5 M  $\text{H}_2\text{SO}_4$  at different scan rates in a non-faradaic region with potential range of 0.04 V to 0.24 V Vs RHE.

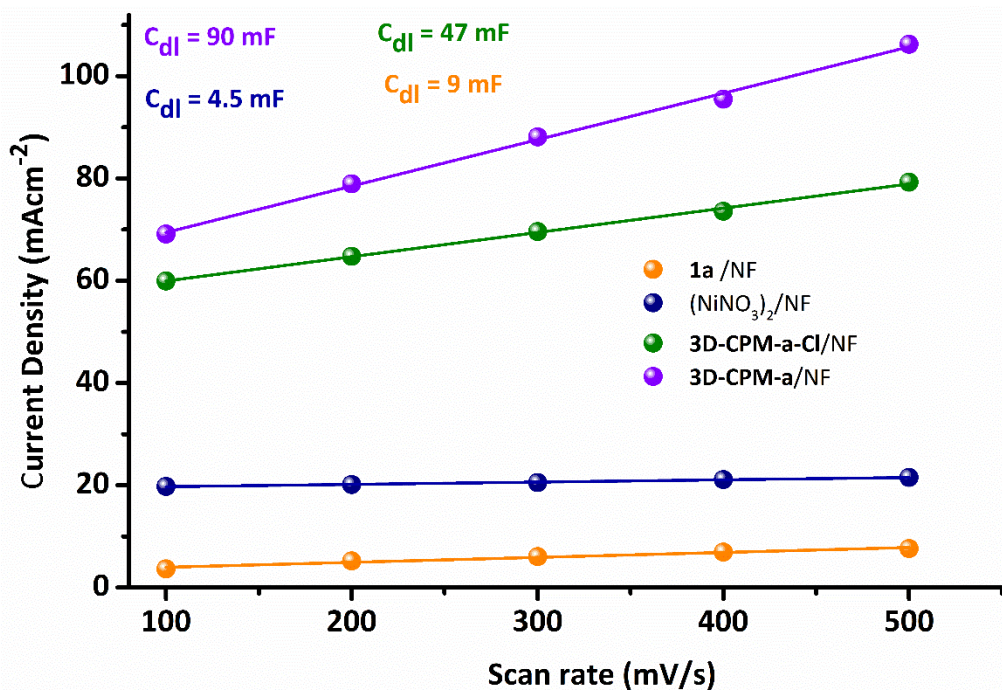

**Figure S14** Linear fitting of capacitive currents Vs scan rates to estimate  $C_{dl}$  for **1a/NF**,  $\text{Ni}(\text{NO}_3)_2/\text{NF}$ ,  $\text{NiCl}_2\text{-1a/NF}$  and **3D-CPM-a/NF** in 0.5 M  $\text{H}_2\text{SO}_4$  at different scan rates in a non-faradaic region with potential range of 0.04 V to 0.24 V Vs RHE.

## 6. Post Catalytic Characterizations

### Field Emission Scanning Electron Microscopy

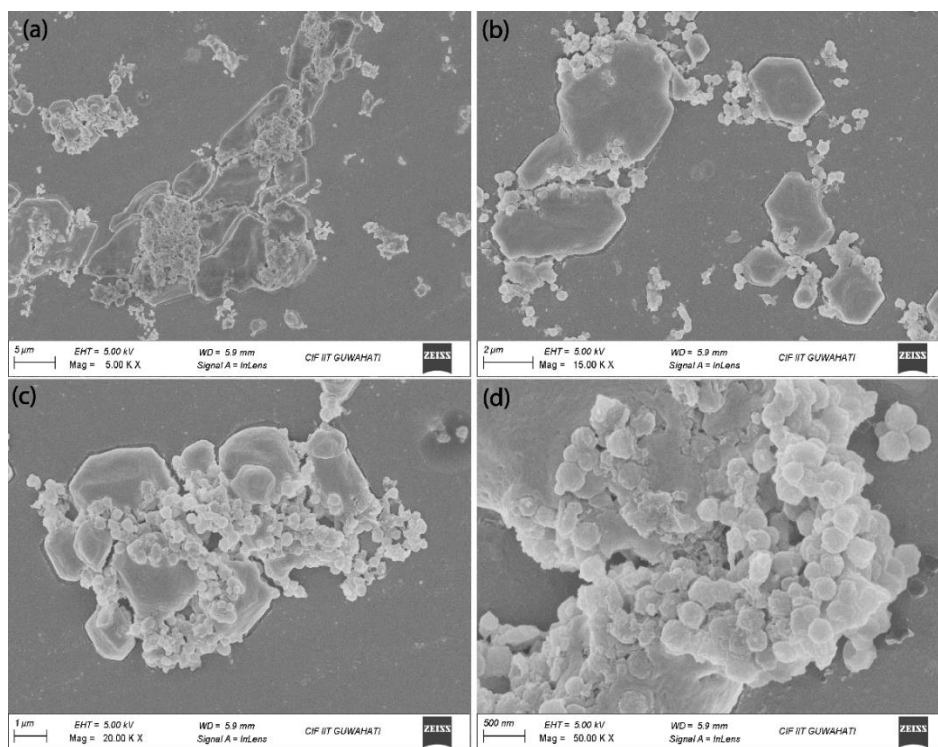

**Figure S15** Post catalytic FESEM images of **3D-CPM-a** taken in a magnification range of 5 KX -50 KX in a Zeiss Sigma 300 instrument.

### X-ray Photoelectron Spectroscopy

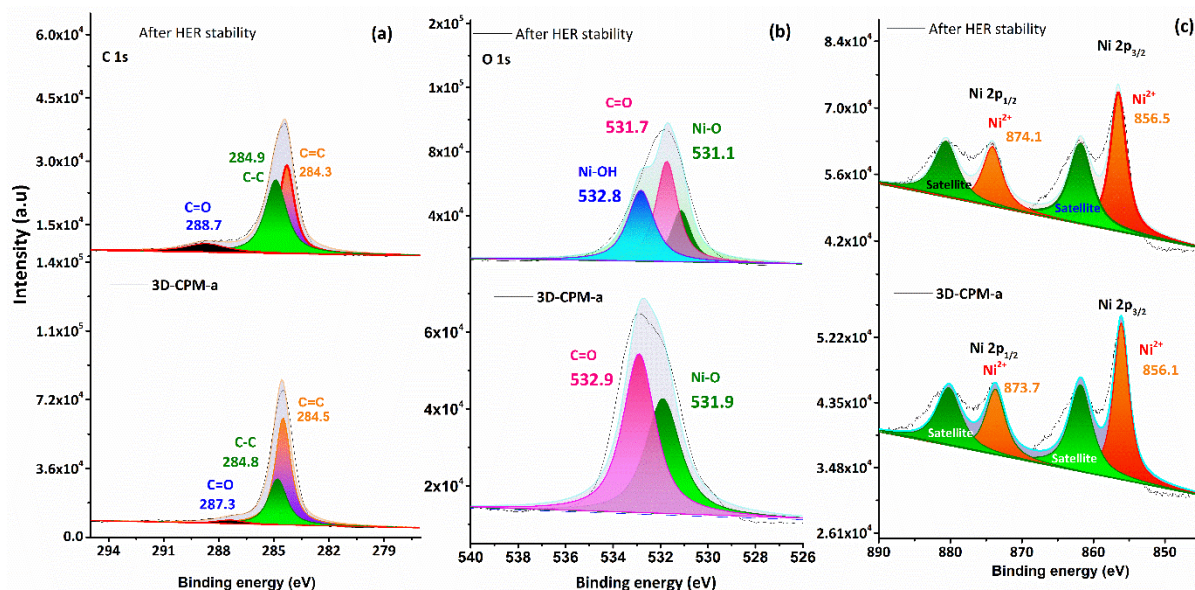

**Figure S16** Comparison of XPS analysis of **3D-CPM-a** before and after HER (a) high resolution C1s spectra (b) high resolution O1s spectra and (c) high resolution Ni 2p spectra.

## 7. Control Studies

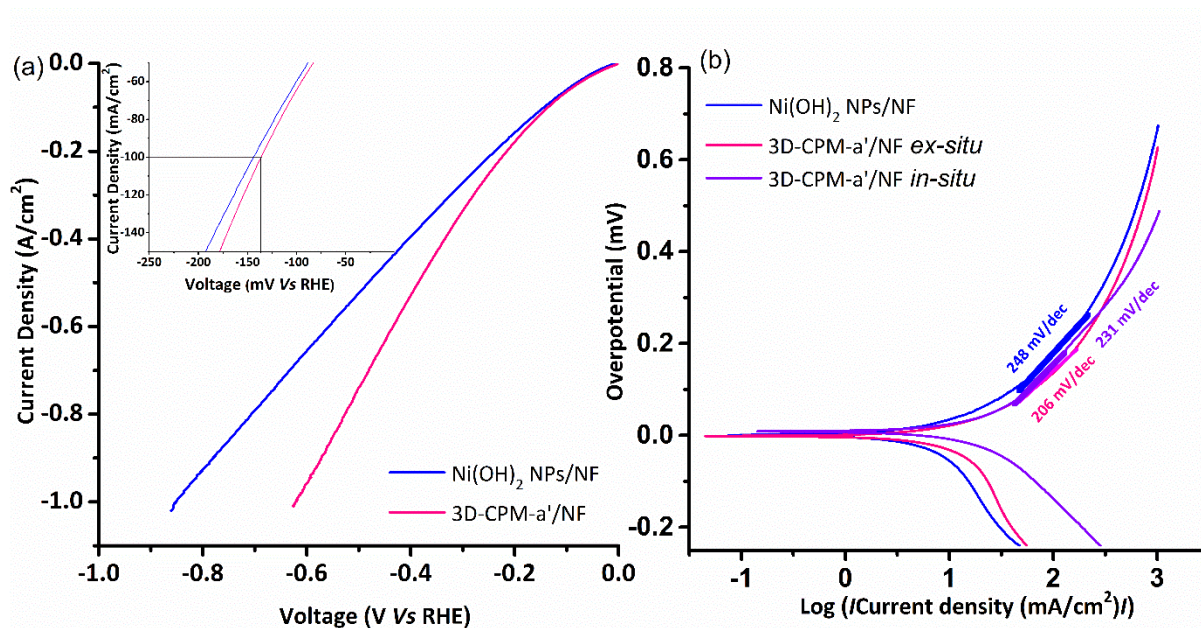

**Figure S17** (a) Linear sweep voltammetric plot for HER in 0.5 M  $\text{H}_2\text{SO}_4$  using  $\text{Ni}(\text{OH})_2$  NPs/NF and **3D-CPM-a'** (*ex-situ*) at  $90^\circ\text{C}$  performed at 10 mV/s. The LSV plot is an average of 2 runs for each catalyst, (b) Tafel plots for  $\text{Ni}(\text{OH})_2$  NPs/NF and **3D-CPM-a'** (*ex-situ* and *in-situ*).

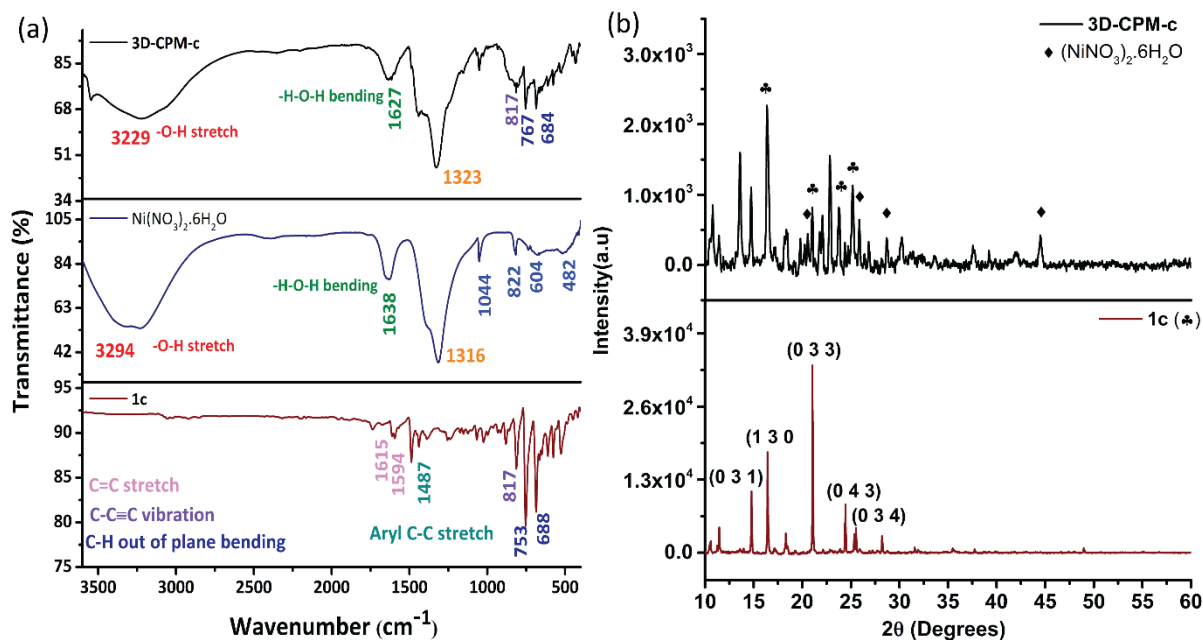

**Figure S18** (a) A comparative FT-IR plot of **1c**,  $\text{Ni}(\text{NO}_3)_2 \cdot 6\text{H}_2\text{O}$  and **3D-CPM-c** (b) *p*-XRD of **1c** and **3D-CPM-c** carried out using a Rigaku SmartLab diffractometer utilizing  $\text{Cu K}\alpha$  radiation ( $\lambda = 1.541 \text{ \AA}$ ) at 40 kV and 125 mA. The  $2\theta$  angular region between  $10^\circ$  and  $60^\circ$  was explored at a scan rate of  $10^\circ/\text{min}$  in a continuous scan mode.

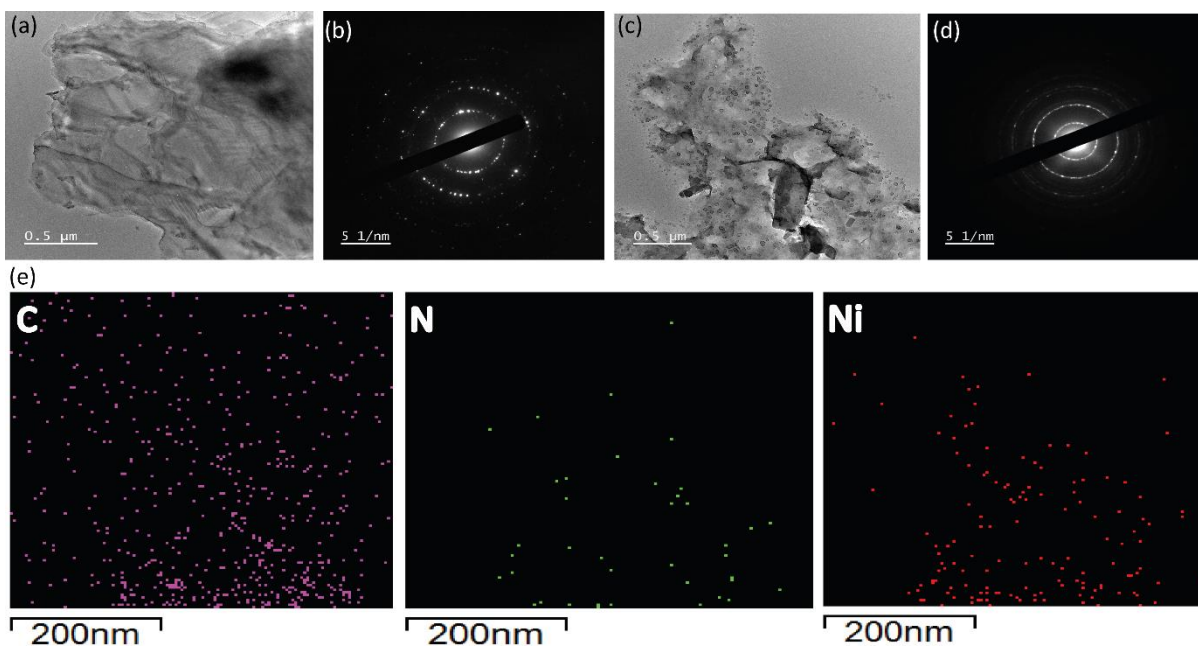

**Figure S19** (a) FETEM image of **1c** at 500 nm (b) SAED of **1c** at 5 nm (c) FETEM image of **3D-CPM-c** at 500 nm (d) SAED of **3D-CPM-c** at 5nm taken in a JEOL Model 2100F instrument after drop-casting on a Cu-grid and drying at 70°C for overnight. (e) TEM elemental mapping of **3D-CPM-c**.

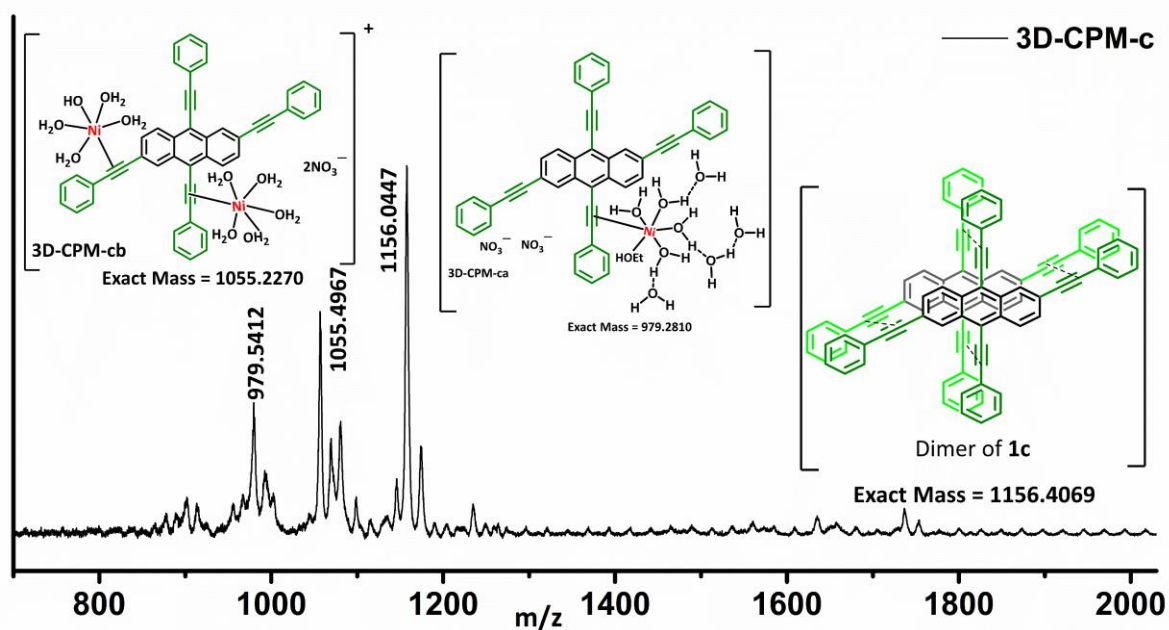

**Figure S20** MALDI analysis of **3D-CPM-c** performed using sinapic acid as MATRIX and ethanol + water (1:1) as solvents.

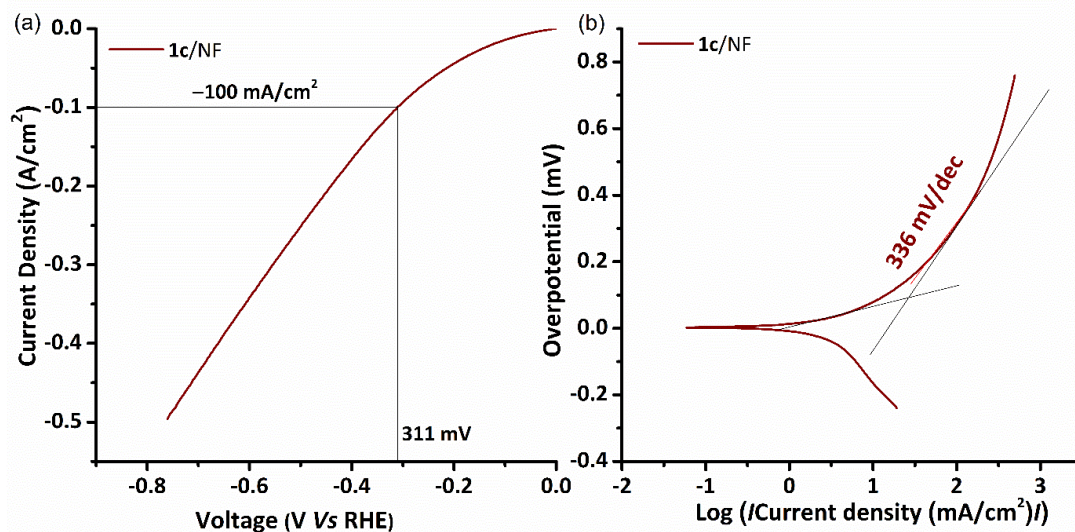

**Figure S21** (a) Linear sweep voltammetric plot for HER in 0.5 M H<sub>2</sub>SO<sub>4</sub> using 1c/NF at 90°C performed at 10 mV/s. The LSV plot is an average of 2 runs, (b) Tafel plot for 1c/NF at 90°C.

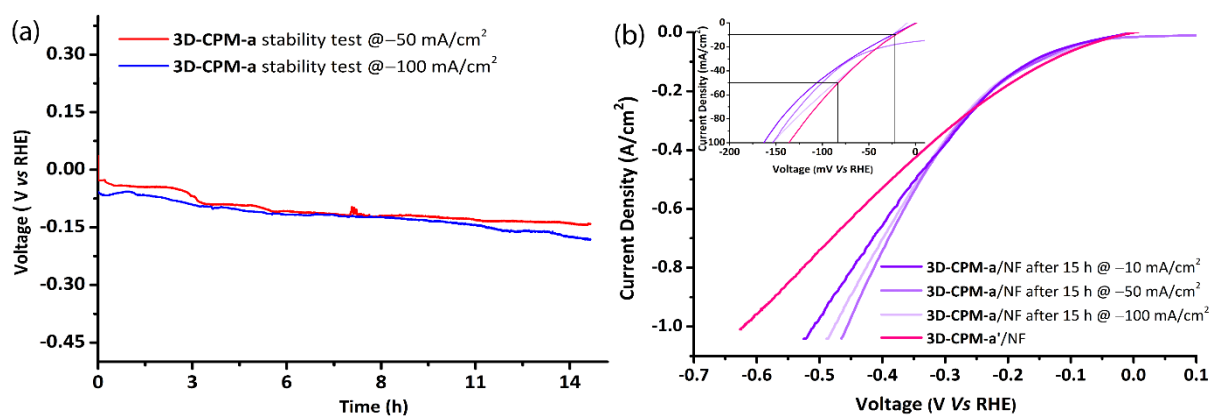

**Figure S22** (a) V-t response of 3D-CPM-a at -50 mA/cm<sup>2</sup> and -100 mA/cm<sup>2</sup> for 15 h. (b) Comparative linear sweep voltammetric plot for 3D-CPM-a after chronopotentiometry at varied current densities for 15 h in comparison to 3D-CPM-a'/NF 90°C performed at 10 mV/s.

**Table S2.** Comparative HER performances of *ex-situ* and *in-situ* generated 3D-CPM-a' with Ni(OH)<sub>2</sub> nanoparticles

| Current Density (mA/cm <sup>2</sup> ) | $\eta$ (mV) of 3D-CPM-a' ex-situ | $\eta$ (mV) of 3D-CPM-a' in-situ | $\eta$ (mV) of Ni(OH) <sub>2</sub> /NF |
|---------------------------------------|----------------------------------|----------------------------------|----------------------------------------|
| -10                                   | 21 ± 0.1                         | 19 ± 4                           | 34 ± 2                                 |
| -50                                   | 82 ± 3                           | 84 ± 11                          | 114 ± 3                                |
| -100                                  | 137 ± 4                          | 155                              | 174 ± 1                                |

## 8. DFT Studies

**Table S3.** Calculated Mulliken charges in eV for the hydrogen binding sites

| Mulliken Charges (eV) |           |              |              |
|-----------------------|-----------|--------------|--------------|
|                       | *3D-CPM-a | *3D-CPM-a_1H | *3D-CPM-a_2H |
| O                     | -0.33     | -0.21        | -0.28        |
| Ni                    | -0.05     | -0.03        | -0.15        |

### Energies of the optimized geometries:

| Structures                 | Energy (a.u.) |
|----------------------------|---------------|
| *3D-CPM-a                  | -1972.1141    |
| *3D-CPM-a_1H               | -1972.6822    |
| *3D-CPM-a_2H               | -1973.2525    |
| *3D-CPM-a + H <sub>2</sub> | -1973.2854    |
| H <sub>2</sub>             | -1.1652       |
| H                          | -0.5826       |

### Coordinates of the Optimized Geometries:

#### \*3D-CPM-a:

|   |              |              |              |
|---|--------------|--------------|--------------|
| C | 31.387610742 | 25.925232415 | 27.750152808 |
| C | 30.281066180 | 26.708284071 | 27.940065357 |
| C | 30.380321255 | 28.126827727 | 28.059960353 |
| C | 31.681602308 | 28.734958999 | 27.954490502 |
| C | 32.810486975 | 27.900822807 | 27.764722977 |
| C | 32.691302005 | 26.516914782 | 27.664647652 |
| C | 29.228925690 | 28.934385060 | 28.260329151 |
| C | 31.815850496 | 30.161378705 | 28.038019197 |
| C | 30.673080901 | 30.958886538 | 28.334941797 |
| C | 29.372400572 | 30.346575953 | 28.443552419 |

|   |              |              |              |
|---|--------------|--------------|--------------|
| C | 28.254100671 | 31.159258013 | 28.745260263 |
| H | 27.278375517 | 30.687895097 | 28.856927050 |
| C | 28.377134270 | 32.533529315 | 28.944674665 |
| C | 29.673336961 | 33.134276700 | 28.826074833 |
| C | 30.771173751 | 32.368096875 | 28.526722218 |
| H | 31.297892437 | 24.841630061 | 27.679335906 |
| H | 29.293314063 | 26.253741550 | 28.016387291 |
| H | 33.795727143 | 28.361261058 | 27.706729661 |
| H | 29.773477315 | 34.206346439 | 28.994144177 |
| H | 31.756064491 | 32.829451931 | 28.448414204 |
| C | 27.941499139 | 28.353774764 | 28.242928297 |
| C | 26.817231101 | 27.872316658 | 28.165036434 |
| C | 25.505562717 | 27.379408465 | 27.972887225 |
| C | 24.914679631 | 26.433976737 | 28.848041621 |
| C | 24.732964697 | 27.847038325 | 26.880319898 |
| C | 23.609491163 | 26.005152630 | 28.660644769 |
| H | 25.497474973 | 26.060218491 | 29.690133949 |
| C | 23.446101485 | 27.377138949 | 26.664637091 |
| H | 25.167945169 | 28.582905251 | 26.203831423 |
| C | 22.841373389 | 26.452069987 | 27.554969375 |
| H | 23.153563969 | 25.305410502 | 29.361743462 |
| H | 22.872748480 | 27.757990894 | 25.818441171 |
| C | 21.438130372 | 26.040327011 | 27.418635708 |
| O | 20.755924340 | 25.738405506 | 28.476990417 |
| C | 27.238239852 | 33.295443698 | 29.292948670 |
| C | 26.224435228 | 33.902774788 | 29.614297427 |
| C | 25.020808695 | 34.500540054 | 30.042890837 |
| C | 24.923756996 | 35.878035563 | 30.363355667 |
| C | 23.860223670 | 33.699132691 | 30.192071714 |
| C | 23.749961446 | 36.409377214 | 30.873981558 |
| H | 25.793584402 | 36.521188826 | 30.234982644 |

|   |              |              |              |
|---|--------------|--------------|--------------|
| C | 22.695797211 | 34.231960726 | 30.714803841 |
| H | 23.904308113 | 32.647560158 | 29.909483583 |
| C | 22.619980852 | 35.590407075 | 31.113013694 |
| H | 23.718418163 | 37.471007861 | 31.131595701 |
| H | 21.819002678 | 33.594610920 | 30.814213531 |
| C | 21.408349318 | 36.115428859 | 31.737576952 |
| O | 21.143566749 | 37.364868560 | 31.809650921 |
| C | 33.072922055 | 30.745355160 | 27.781768672 |
| C | 33.824741850 | 25.691006453 | 27.496029369 |
| C | 34.782657818 | 24.941599334 | 27.369200020 |
| C | 35.897333989 | 24.078726496 | 27.267729722 |
| C | 37.207516551 | 24.564755410 | 27.475210330 |
| C | 35.732174793 | 22.700077897 | 27.002289214 |
| C | 38.300237676 | 23.709551073 | 27.428156224 |
| H | 37.349538205 | 25.621645966 | 27.699933096 |
| C | 36.827667799 | 21.848210346 | 26.975096756 |
| H | 34.727581039 | 22.310672788 | 26.834462167 |
| C | 38.132805631 | 22.333705176 | 27.187406413 |
| H | 39.294535829 | 24.109951782 | 27.625976635 |
| H | 36.690842124 | 20.782128090 | 26.792956981 |
| C | 39.270441277 | 21.366431332 | 27.166940790 |
| O | 38.997202319 | 20.126399877 | 27.646033403 |
| C | 34.183926736 | 31.165671058 | 27.477344978 |
| C | 35.473799111 | 31.576234567 | 27.069866073 |
| C | 36.233030457 | 30.756780488 | 26.202728027 |
| C | 36.048109169 | 32.802960742 | 27.486205476 |
| C | 37.502390432 | 31.138192888 | 25.782632055 |
| H | 35.796285467 | 29.825081538 | 25.840245433 |
| C | 37.321447715 | 33.166849990 | 27.077604137 |
| H | 35.479425409 | 33.456135173 | 28.148587311 |
| C | 38.090124630 | 32.341756248 | 26.224038724 |

|   |              |              |              |
|---|--------------|--------------|--------------|
| H | 38.028080598 | 30.502561133 | 25.071887086 |
| H | 37.758187910 | 34.107344125 | 27.411934906 |
| C | 39.436547015 | 32.818081263 | 25.795535640 |
| O | 39.672010451 | 34.131422818 | 25.854902159 |
| C | 40.284280624 | 21.456335896 | 26.060882896 |
| C | 41.113764629 | 22.578953679 | 25.881281888 |
| C | 40.422273080 | 20.376875432 | 25.166916997 |
| C | 42.053267450 | 22.614264383 | 24.850106493 |
| H | 41.051136477 | 23.412774574 | 26.579439473 |
| C | 41.362780339 | 20.414534181 | 24.135936360 |
| H | 39.769801326 | 19.510597710 | 25.282288150 |
| C | 42.183413166 | 21.533894170 | 23.970745043 |
| H | 42.698389622 | 23.487879328 | 24.737513649 |
| H | 41.446475805 | 19.569168126 | 23.450477201 |
| H | 42.917523707 | 21.564850228 | 23.164748115 |
| C | 20.755607027 | 26.011680601 | 26.120019955 |
| C | 21.432551751 | 25.677423211 | 24.926851732 |
| C | 19.370085367 | 26.276867420 | 26.055876052 |
| C | 20.747109362 | 25.616382418 | 23.715277821 |
| H | 22.495166573 | 25.435650520 | 24.961799694 |
| C | 18.691957670 | 26.221807922 | 24.841713140 |
| H | 18.845446788 | 26.556922140 | 26.969936051 |
| C | 19.376425954 | 25.893364511 | 23.665172215 |
| H | 21.283067483 | 25.343576040 | 22.805247826 |
| H | 17.624115688 | 26.442746852 | 24.807241840 |
| H | 18.842412038 | 25.849403690 | 22.715297098 |
| C | 40.369562949 | 32.006098010 | 24.947266859 |
| C | 40.575757026 | 30.616176750 | 25.133870299 |
| C | 41.180486474 | 32.659545689 | 23.989297869 |
| C | 41.567884077 | 29.929099593 | 24.425201457 |
| H | 39.969360527 | 30.067511369 | 25.853702263 |

|   |              |              |              |
|---|--------------|--------------|--------------|
| C | 42.160366702 | 31.966814627 | 23.279605103 |
| H | 41.024570196 | 33.727209724 | 23.832442722 |
| C | 42.369463853 | 30.596505589 | 23.496420708 |
| H | 41.707483075 | 28.863099889 | 24.610267161 |
| H | 42.764536814 | 32.497590024 | 22.541102327 |
| H | 43.140887578 | 30.060062790 | 22.943436373 |
| C | 20.413306573 | 35.230005463 | 32.391305954 |
| C | 20.806603837 | 34.098303933 | 33.132718045 |
| C | 19.057419370 | 35.612702812 | 32.413630478 |
| C | 19.867564133 | 33.361325066 | 33.855391197 |
| H | 21.860102743 | 33.822794721 | 33.175363557 |
| C | 18.122947355 | 34.870856421 | 33.129414901 |
| H | 18.749343152 | 36.502699092 | 31.865180355 |
| C | 18.523027746 | 33.739505049 | 33.850641340 |
| H | 20.189794353 | 32.488533846 | 34.424423100 |
| H | 17.075182942 | 35.174226354 | 33.125006414 |
| H | 17.788688382 | 33.154434580 | 34.404833827 |
| C | 29.847497743 | 26.293770512 | 31.433474519 |
| C | 29.029423174 | 27.379332028 | 31.647947971 |
| C | 29.548562361 | 28.699206642 | 31.789497603 |
| C | 30.964577301 | 28.889529785 | 31.665485799 |
| C | 31.779664793 | 27.763096549 | 31.458505057 |
| C | 31.260999459 | 26.471605789 | 31.352660377 |
| C | 28.705870801 | 29.825346413 | 32.045220964 |
| C | 31.540602423 | 30.209143101 | 31.752525708 |
| C | 30.704698931 | 31.323818276 | 32.065377609 |
| C | 29.290970308 | 31.132353966 | 32.225515044 |
| C | 28.485184683 | 32.241852994 | 32.548225502 |
| H | 27.412913501 | 32.096267825 | 32.665461032 |
| C | 29.018482973 | 33.520621663 | 32.715757554 |
| C | 30.424360584 | 33.704708917 | 32.538595697 |

|   |              |              |              |
|---|--------------|--------------|--------------|
| C | 31.231011384 | 32.636813752 | 32.223284217 |
| H | 29.428049029 | 25.292582967 | 31.334683275 |
| H | 27.949826458 | 27.244301930 | 31.716965049 |
| H | 32.855006967 | 27.903213988 | 31.382101199 |
| H | 30.848071465 | 34.701240447 | 32.665262164 |
| H | 32.304394821 | 32.779899182 | 32.092905981 |
| C | 27.321078313 | 29.682305125 | 32.111204817 |
| C | 26.092656481 | 29.618622341 | 32.146004109 |
| C | 24.699921677 | 29.526221549 | 32.129968239 |
| C | 24.057769316 | 28.265690922 | 31.969929085 |
| C | 23.865366148 | 30.676092368 | 32.252559643 |
| C | 22.690412726 | 28.172281409 | 31.853154495 |
| H | 24.671925061 | 27.366309580 | 31.925139993 |
| C | 22.493702424 | 30.580481493 | 32.131021628 |
| H | 24.329008669 | 31.646734822 | 32.431202039 |
| C | 21.850539488 | 29.332388594 | 31.864130475 |
| H | 22.233345555 | 27.190679977 | 31.717390667 |
| H | 21.888557242 | 31.479032826 | 32.243083216 |
| C | 20.441004686 | 29.196853479 | 31.600088007 |
| O | 19.916892070 | 27.994498921 | 31.454561313 |
| C | 28.149333289 | 34.584828575 | 33.049472411 |
| C | 27.306188813 | 35.425384038 | 33.331437794 |
| C | 26.249386083 | 36.319193050 | 33.616592633 |
| C | 26.329086324 | 37.698998926 | 33.319222981 |
| C | 25.043018003 | 35.830465300 | 34.170154232 |
| C | 25.224436375 | 38.520932983 | 33.480491073 |
| H | 27.262897471 | 38.109342062 | 32.934065785 |
| C | 23.947227326 | 36.662990656 | 34.342271916 |
| H | 24.976789402 | 34.776493238 | 34.441660007 |
| C | 23.990352092 | 38.015553500 | 33.942463812 |
| H | 25.297110234 | 39.579278345 | 33.235342643 |

|   |              |              |              |
|---|--------------|--------------|--------------|
| H | 23.036605920 | 36.244323105 | 34.764307889 |
| C | 22.786734207 | 38.891527891 | 33.920316718 |
| O | 22.901403954 | 40.101785541 | 33.339495966 |
| C | 32.905059773 | 30.346955992 | 31.495797221 |
| C | 32.208061283 | 25.433975310 | 31.189716607 |
| C | 33.220059676 | 24.752222463 | 31.082285408 |
| C | 34.524820170 | 24.216640733 | 31.062836541 |
| C | 35.555530801 | 24.996552381 | 31.649954226 |
| C | 34.877499270 | 22.980922075 | 30.470521228 |
| C | 36.870891577 | 24.574683128 | 31.617412935 |
| H | 35.293318728 | 25.934361846 | 32.139661253 |
| C | 36.199464759 | 22.568170814 | 30.431334519 |
| H | 34.099652961 | 22.369317755 | 30.013474757 |
| C | 37.233239825 | 23.360641492 | 30.983369158 |
| H | 37.630086992 | 25.182108357 | 32.107552660 |
| H | 36.465251037 | 21.633492326 | 29.939744067 |
| C | 38.615467897 | 22.896538016 | 30.951242232 |
| O | 38.929095793 | 21.706416476 | 30.629195587 |
| C | 34.096904724 | 30.304040475 | 31.193655126 |
| C | 35.428305584 | 30.182701998 | 30.785310387 |
| C | 35.935707944 | 28.921176591 | 30.360008985 |
| C | 36.308585809 | 31.297451770 | 30.753367997 |
| C | 37.229327094 | 28.799577143 | 29.893672369 |
| H | 35.286434572 | 28.046324218 | 30.393419665 |
| C | 37.601972741 | 31.166255294 | 30.295649862 |
| H | 35.937376428 | 32.271560621 | 31.071930783 |
| C | 38.099921331 | 29.921097041 | 29.826862906 |
| H | 37.588517601 | 27.813378935 | 29.600864617 |
| H | 38.235523942 | 32.048756020 | 30.250278266 |
| C | 39.462668436 | 29.838350487 | 29.332521729 |
| O | 40.328300301 | 30.731749766 | 29.640375077 |

|   |              |              |              |
|---|--------------|--------------|--------------|
| C | 39.732164676 | 23.808350126 | 31.339523470 |
| C | 39.844015275 | 25.127926960 | 30.860143275 |
| C | 40.755079910 | 23.301089219 | 32.169298432 |
| C | 40.937672381 | 25.919098736 | 31.213580350 |
| H | 39.082539242 | 25.522442756 | 30.187266483 |
| C | 41.841620330 | 24.100248318 | 32.529303013 |
| H | 40.673268318 | 22.273722624 | 32.527314818 |
| C | 41.934758144 | 25.413122475 | 32.052978220 |
| H | 41.013283528 | 26.933140815 | 30.823019584 |
| H | 42.615105015 | 23.699568622 | 33.186081122 |
| H | 42.783780397 | 26.038088414 | 32.332683644 |
| C | 19.517333390 | 30.332010899 | 31.372918442 |
| C | 19.862526539 | 31.451608874 | 30.588392439 |
| C | 18.191742746 | 30.241476037 | 31.847670589 |
| C | 18.922931713 | 32.436787157 | 30.288149495 |
| H | 20.867119617 | 31.528853586 | 30.170012212 |
| C | 17.254745380 | 31.229845866 | 31.551385051 |
| H | 17.906148671 | 29.381108365 | 32.453531573 |
| C | 17.615712546 | 32.332657742 | 30.770286671 |
| H | 19.212383126 | 33.286064996 | 29.667735613 |
| H | 16.237183112 | 31.140559536 | 31.935205088 |
| H | 16.883955735 | 33.106796999 | 30.538520536 |
| C | 39.909826755 | 28.736350644 | 28.439988115 |
| C | 39.061588890 | 28.146761937 | 27.479096239 |
| C | 41.262985631 | 28.338519840 | 28.475614823 |
| C | 39.549985453 | 27.178949347 | 26.600493730 |
| H | 38.030989170 | 28.489051609 | 27.390963113 |
| C | 41.742943857 | 27.358388135 | 27.609616432 |
| H | 41.927290447 | 28.804547745 | 29.204180560 |
| C | 40.887047447 | 26.772154858 | 26.670344393 |
| H | 38.886439589 | 26.741763763 | 25.853954282 |

|    |              |              |              |
|----|--------------|--------------|--------------|
| H  | 42.786955967 | 27.047561465 | 27.667595617 |
| H  | 41.259267097 | 26.007757139 | 25.986805151 |
| C  | 21.709858588 | 38.776095811 | 34.963306055 |
| C  | 20.923375701 | 37.624328348 | 35.150117601 |
| C  | 21.417288409 | 39.913873515 | 35.739903251 |
| C  | 19.868476248 | 37.617237796 | 36.065244337 |
| H  | 21.081606144 | 36.746279576 | 34.528734808 |
| C  | 20.362445514 | 39.908296846 | 36.652558601 |
| H  | 22.020472390 | 40.811396923 | 35.601768449 |
| C  | 19.578578175 | 38.760702406 | 36.818331975 |
| H  | 19.259459375 | 36.718175477 | 36.170898381 |
| H  | 20.149640401 | 40.804158034 | 37.237806932 |
| H  | 18.750689696 | 38.757397406 | 37.528496890 |
| Ni | 40.712428743 | 33.310556689 | 27.175102057 |
| O  | 42.186590118 | 34.720693622 | 27.805101146 |
| H  | 42.961648944 | 34.348734382 | 27.287949515 |
| O  | 41.831063187 | 31.638603511 | 27.710013706 |
| H  | 41.658805728 | 31.030208175 | 26.954106354 |
| H  | 41.966138534 | 35.567749634 | 27.378998110 |
| H  | 41.370451243 | 31.184423026 | 28.499513494 |
| O  | 43.924970514 | 33.161572448 | 26.446976583 |
| H  | 43.524396232 | 33.048187995 | 25.562400407 |
| O  | 40.085155912 | 33.452940853 | 29.419246256 |
| H  | 40.852680977 | 33.916203634 | 29.799798794 |
| H  | 43.512287484 | 32.436645005 | 26.968159680 |
| H  | 40.149330822 | 32.517930567 | 29.739606595 |
| Ni | 22.016320717 | 38.957834436 | 32.142558239 |
| O  | 24.457075886 | 40.083457487 | 30.538564987 |
| H  | 23.605795806 | 40.330490220 | 30.132653506 |
| O  | 20.490201901 | 41.637502814 | 32.646732903 |
| H  | 21.287263808 | 41.365993317 | 33.161043855 |

|    |              |              |              |
|----|--------------|--------------|--------------|
| H  | 24.267421497 | 40.203217880 | 31.489714761 |
| H  | 19.812168082 | 40.971222491 | 32.933137712 |
| O  | 21.419508672 | 40.267239910 | 30.635134913 |
| H  | 20.971821374 | 40.938776139 | 31.269663559 |
| O  | 18.851424150 | 39.366637003 | 33.171681713 |
| H  | 18.805640709 | 39.200376198 | 34.132955084 |
| H  | 20.719912012 | 39.919145622 | 30.055363918 |
| H  | 19.543823954 | 38.736185704 | 32.878204864 |
| Ni | 20.553012240 | 26.881068097 | 29.999238113 |
| O  | 17.379015514 | 27.332824776 | 30.294200474 |
| H  | 18.204209110 | 27.699604984 | 30.702915578 |
| O  | 20.012786650 | 25.302800344 | 31.096539842 |
| H  | 19.648638004 | 25.660548223 | 31.929292763 |
| O  | 18.072225743 | 24.786498216 | 29.420708836 |
| H  | 18.704799816 | 24.909282381 | 28.682309867 |
| O  | 21.094052422 | 28.489608565 | 28.935091991 |
| H  | 21.390611607 | 29.173806446 | 29.578424762 |
| H  | 21.882923444 | 28.279041495 | 28.387206014 |
| H  | 19.217227809 | 24.933794699 | 30.569715306 |
| H  | 17.690858154 | 25.692222760 | 29.567474662 |
| H  | 16.995172116 | 28.084101167 | 29.811480508 |
| Ni | 40.131067107 | 21.036806579 | 28.831843872 |
| O  | 38.284576382 | 19.045626525 | 30.635643967 |
| H  | 38.069158367 | 18.921364012 | 29.691830044 |
| O  | 40.950088382 | 19.527756236 | 30.085266341 |
| H  | 41.124807896 | 18.850617694 | 29.373989541 |
| O  | 40.859441019 | 18.067009384 | 27.757877999 |
| H  | 40.178617248 | 18.751268085 | 27.510655098 |
| O  | 41.678325445 | 22.238469272 | 29.370261710 |
| H  | 42.212826079 | 21.600948771 | 29.885206041 |
| H  | 41.369026274 | 22.880263602 | 30.047899943 |

|   |              |              |              |
|---|--------------|--------------|--------------|
| H | 41.566998349 | 18.188294126 | 27.102437026 |
| H | 38.229127606 | 20.028143584 | 30.734760899 |
| H | 40.095609543 | 19.208704651 | 30.495453347 |

**\*3D-CPM-a\_1H:**

|   |              |              |              |
|---|--------------|--------------|--------------|
| C | 31.278422036 | 26.103877328 | 27.751867850 |
| C | 30.173535653 | 26.890537532 | 27.941506243 |
| C | 30.277509044 | 28.307659137 | 28.062035147 |
| C | 31.579477849 | 28.911679357 | 27.955663245 |
| C | 32.704238598 | 28.076747829 | 27.767063354 |
| C | 32.580935619 | 26.693161660 | 27.667630913 |
| C | 29.129554367 | 29.121459094 | 28.260763073 |
| C | 31.719258653 | 30.338033841 | 28.037789762 |
| C | 30.583131547 | 31.139644329 | 28.333253442 |
| C | 29.279278761 | 30.533398345 | 28.445089135 |
| C | 28.167603053 | 31.348707182 | 28.750788492 |
| H | 27.190319368 | 30.881752994 | 28.865800267 |
| C | 28.296251619 | 32.725312853 | 28.949918451 |
| C | 29.595897446 | 33.319763632 | 28.825456903 |
| C | 30.688360644 | 32.549256938 | 28.523650447 |
| H | 31.185978862 | 25.020448487 | 27.680499857 |
| H | 29.184121464 | 26.439314678 | 28.016006849 |
| H | 33.691166468 | 28.533121791 | 27.708798912 |
| H | 29.701902474 | 34.391451316 | 28.992517654 |
| H | 31.675880402 | 33.004493117 | 28.441619288 |
| C | 27.841063682 | 28.546458218 | 28.239179613 |
| C | 26.719027092 | 28.060085003 | 28.152813440 |
| C | 25.419291789 | 27.543637134 | 27.949083542 |
| C | 24.836726669 | 26.595904518 | 28.828050055 |
| C | 24.654201851 | 27.973505951 | 26.834842240 |
| C | 23.545458577 | 26.135252144 | 28.626809948 |

|   |              |              |              |
|---|--------------|--------------|--------------|
| H | 25.414662285 | 26.248714719 | 29.684749521 |
| C | 23.380769748 | 27.475213636 | 26.606566862 |
| H | 25.085021647 | 28.706383964 | 26.152459227 |
| C | 22.780580122 | 26.555212456 | 27.506085233 |
| H | 23.093238513 | 25.439282189 | 29.334046218 |
| H | 22.811970727 | 27.834976493 | 25.748808459 |
| C | 21.376945955 | 26.148115192 | 27.380015299 |
| O | 20.701873925 | 25.853194144 | 28.445507753 |
| C | 27.164025688 | 33.488859678 | 29.294517621 |
| C | 26.141253564 | 34.091157862 | 29.605962829 |
| C | 24.938342771 | 34.688703942 | 30.011720008 |
| C | 24.831564563 | 36.079006068 | 30.290793611 |
| C | 23.774202375 | 33.891734098 | 30.193538876 |
| C | 23.657148452 | 36.620584839 | 30.774395153 |
| H | 25.710868441 | 36.709108330 | 30.154054136 |
| C | 22.611975505 | 34.433979698 | 30.700236401 |
| H | 23.818440002 | 32.832337004 | 29.940450244 |
| C | 22.518852499 | 35.812541650 | 31.050991168 |
| H | 23.614390905 | 37.684360144 | 31.030341221 |
| H | 21.737434329 | 33.795983437 | 30.818409755 |
| C | 21.323395880 | 36.350115991 | 31.648005912 |
| O | 21.045441653 | 37.637379602 | 31.611370180 |
| C | 32.981200517 | 30.911545187 | 27.781863891 |
| C | 33.719585686 | 25.877087335 | 27.500822143 |
| C | 34.699835034 | 25.158336667 | 27.375252930 |
| C | 35.826777248 | 24.314848061 | 27.273255224 |
| C | 37.130913190 | 24.812400169 | 27.486947853 |
| C | 35.673186640 | 22.937364542 | 26.996302715 |
| C | 38.232787614 | 23.966955790 | 27.436605259 |
| H | 37.260963836 | 25.869040638 | 27.718221570 |
| C | 36.776804019 | 22.098420186 | 26.963557371 |

|   |              |              |              |
|---|--------------|--------------|--------------|
| H | 34.672248708 | 22.540767651 | 26.823919770 |
| C | 38.077114913 | 22.592550776 | 27.184489521 |
| H | 39.223055886 | 24.376412549 | 27.634347602 |
| H | 36.652300676 | 21.032924937 | 26.770230800 |
| C | 39.211700015 | 21.621514857 | 27.144305401 |
| O | 38.914504907 | 20.368236333 | 27.572092864 |
| C | 34.096681018 | 31.318335856 | 27.477254636 |
| C | 35.389682853 | 31.720379239 | 27.071789051 |
| C | 36.148586780 | 30.898420549 | 26.206151768 |
| C | 35.966929941 | 32.943187980 | 27.492235199 |
| C | 37.418076835 | 31.280679475 | 25.785787884 |
| H | 35.711371106 | 29.966905865 | 25.844175641 |
| C | 37.239502310 | 33.308160440 | 27.082834164 |
| H | 35.399186119 | 33.594073700 | 28.157689081 |
| C | 38.005918561 | 32.486501036 | 26.224733196 |
| H | 37.943245041 | 30.644607168 | 25.075163760 |
| H | 37.677927896 | 34.246941761 | 27.419198386 |
| C | 39.346166619 | 32.971647167 | 25.786230374 |
| O | 39.581516986 | 34.285295779 | 25.847192073 |
| C | 40.222045858 | 21.743105153 | 26.039211267 |
| C | 41.057251099 | 22.867373569 | 25.902080158 |
| C | 40.345772931 | 20.701436670 | 25.100848221 |
| C | 41.985308058 | 22.943487277 | 24.863950685 |
| H | 41.005919280 | 23.668519941 | 26.638246196 |
| C | 41.278284357 | 20.777241799 | 24.064638689 |
| H | 39.687668708 | 19.835533848 | 25.184813434 |
| C | 42.102078182 | 21.899867902 | 23.939675301 |
| H | 42.634509788 | 23.817267239 | 24.782596419 |
| H | 41.352442533 | 19.961056426 | 23.343671174 |
| H | 42.829855562 | 21.960886366 | 23.129767708 |
| C | 20.679719016 | 26.121467214 | 26.088826718 |

|   |              |              |              |
|---|--------------|--------------|--------------|
| C | 21.342157680 | 25.777837811 | 24.889253129 |
| C | 19.294985362 | 26.395281675 | 26.035402626 |
| C | 20.644602821 | 25.714469653 | 23.684825209 |
| H | 22.403845105 | 25.530698770 | 24.913900866 |
| C | 18.603647825 | 26.334977575 | 24.829048212 |
| H | 18.780103927 | 26.687223161 | 26.951262002 |
| C | 19.274156510 | 25.995493415 | 23.647728610 |
| H | 21.170381045 | 25.435665616 | 22.770400865 |
| H | 17.536523721 | 26.560672848 | 24.804823667 |
| H | 18.730525475 | 25.948024317 | 22.703440064 |
| C | 40.281508972 | 32.167112822 | 24.934782702 |
| C | 40.495617749 | 30.777770257 | 25.115935094 |
| C | 41.089447444 | 32.830231506 | 23.980114743 |
| C | 41.494262006 | 30.101248938 | 24.407152270 |
| H | 39.890810307 | 30.222688664 | 25.831952874 |
| C | 42.076590561 | 32.148387928 | 23.272165949 |
| H | 40.926989643 | 33.897344379 | 23.828877707 |
| C | 42.295247427 | 30.778560209 | 23.485115291 |
| H | 41.640407588 | 29.035576338 | 24.588303627 |
| H | 42.679751168 | 32.686253579 | 22.537878745 |
| H | 43.073259895 | 30.249908585 | 22.933793412 |
| C | 20.353605166 | 35.494011199 | 32.353624222 |
| C | 20.774513127 | 34.399214107 | 33.143218123 |
| C | 18.980307372 | 35.823352881 | 32.359897537 |
| C | 19.863809500 | 33.669899926 | 33.904323308 |
| H | 21.834866117 | 34.149603691 | 33.187353135 |
| C | 18.073338092 | 35.090112938 | 33.120826135 |
| H | 18.628274215 | 36.657955280 | 31.754875743 |
| C | 18.507307564 | 34.009940337 | 33.897666489 |
| H | 20.216613842 | 32.835302026 | 34.512013348 |
| H | 17.015857732 | 35.358899906 | 33.101849602 |

|   |              |              |              |
|---|--------------|--------------|--------------|
| H | 17.793680056 | 33.433889953 | 34.487316090 |
| C | 29.770990320 | 26.390288664 | 31.429918860 |
| C | 28.953659349 | 27.479119306 | 31.641978677 |
| C | 29.474045040 | 28.798266514 | 31.782997754 |
| C | 30.890660114 | 28.981351325 | 31.661250672 |
| C | 31.704438247 | 27.854423352 | 31.455348127 |
| C | 31.184769209 | 26.562567085 | 31.349168761 |
| C | 28.635260957 | 29.931379124 | 32.034749999 |
| C | 31.474720811 | 30.298072525 | 31.747546419 |
| C | 30.647046336 | 31.417960689 | 32.060212755 |
| C | 29.232027117 | 31.235517148 | 32.217350329 |
| C | 28.438554605 | 32.350597483 | 32.542428898 |
| H | 27.364827758 | 32.216377522 | 32.659421923 |
| C | 28.985927226 | 33.624261836 | 32.715260327 |
| C | 30.391249889 | 33.800482170 | 32.538344207 |
| C | 31.185833112 | 32.725264616 | 32.220013516 |
| H | 29.347538953 | 25.390724198 | 31.330420015 |
| H | 27.873612917 | 27.345312510 | 31.708465532 |
| H | 32.779675266 | 27.994604243 | 31.376539660 |
| H | 30.823803496 | 34.793159265 | 32.665286367 |
| H | 32.260370092 | 32.857466027 | 32.086772744 |
| C | 27.249881778 | 29.806961168 | 32.102100982 |
| C | 26.018727121 | 29.789390970 | 32.150565641 |
| C | 24.626789375 | 29.701470893 | 32.151579537 |
| C | 23.990728933 | 28.430928342 | 32.041932344 |
| C | 23.782057985 | 30.848361404 | 32.245212182 |
| C | 22.625227002 | 28.323120852 | 31.933766639 |
| H | 24.610819068 | 27.534314444 | 32.029797934 |
| C | 22.410443529 | 30.738949983 | 32.132500679 |
| H | 24.237995406 | 31.828479466 | 32.388468755 |
| C | 21.776796730 | 29.476969475 | 31.901258010 |

|   |              |              |              |
|---|--------------|--------------|--------------|
| H | 22.173539454 | 27.334751726 | 31.836270726 |
| H | 21.799270314 | 31.636896015 | 32.215146700 |
| C | 20.375364699 | 29.313023675 | 31.619975743 |
| O | 19.880850020 | 28.102629574 | 31.447946415 |
| C | 28.122553858 | 34.688138356 | 33.053239162 |
| C | 27.277107837 | 35.525154983 | 33.339112671 |
| C | 26.221201465 | 36.413654068 | 33.624601635 |
| C | 26.365630777 | 37.814486819 | 33.511632637 |
| C | 24.954590118 | 35.910636599 | 34.010821524 |
| C | 25.274436131 | 38.655320783 | 33.680615865 |
| H | 27.346335058 | 38.231222911 | 33.280512268 |
| C | 23.871538291 | 36.753567513 | 34.185879606 |
| H | 24.833291111 | 34.835049054 | 34.139819425 |
| C | 23.985999151 | 38.145385135 | 33.962412381 |
| H | 25.436645428 | 39.731129602 | 33.603126327 |
| H | 22.909665279 | 36.321831209 | 34.451483784 |
| C | 22.784812895 | 39.001838821 | 33.928217008 |
| O | 22.964772540 | 40.346781764 | 33.445971785 |
| C | 32.837626474 | 30.431212311 | 31.491444888 |
| C | 32.135827785 | 25.527057422 | 31.182483879 |
| C | 33.156209064 | 24.857153551 | 31.069255776 |
| C | 34.469065871 | 24.338825839 | 31.030685024 |
| C | 35.502176576 | 25.145834386 | 31.575133398 |
| C | 34.830748343 | 23.093806964 | 30.461878795 |
| C | 36.822959058 | 24.742489961 | 31.528425571 |
| H | 35.236739624 | 26.092557063 | 32.045570317 |
| C | 36.157600804 | 22.698070740 | 30.407733307 |
| H | 34.053478868 | 22.459219572 | 30.035876500 |
| C | 37.193317480 | 23.515969723 | 30.921825090 |
| H | 37.580572484 | 25.376000999 | 31.987113449 |
| H | 36.424609862 | 21.754570330 | 29.934277013 |

|   |              |              |              |
|---|--------------|--------------|--------------|
| C | 38.580245728 | 23.065923840 | 30.889181034 |
| O | 38.906622362 | 21.872447198 | 30.585908211 |
| C | 34.031418887 | 30.399429792 | 31.193253834 |
| C | 35.364613103 | 30.298510906 | 30.790067874 |
| C | 35.899659867 | 29.044006683 | 30.375056009 |
| C | 36.225139045 | 31.431031574 | 30.756452458 |
| C | 37.196318729 | 28.945975178 | 29.913233029 |
| H | 35.267630425 | 28.156836195 | 30.413150587 |
| C | 37.522118054 | 31.323218653 | 30.303231404 |
| H | 35.833058222 | 32.398684623 | 31.069406952 |
| C | 38.044511062 | 30.085697896 | 29.838863634 |
| H | 37.576816467 | 27.965502943 | 29.629051040 |
| H | 38.140898522 | 32.216515130 | 30.254060916 |
| C | 39.399428622 | 30.022055686 | 29.329031249 |
| O | 40.261279118 | 30.927904332 | 29.618681962 |
| C | 39.692684120 | 23.985634204 | 31.276592453 |
| C | 39.817927316 | 25.298720316 | 30.782819179 |
| C | 40.697295043 | 23.490259726 | 32.136899633 |
| C | 40.901064586 | 26.096462773 | 31.156123063 |
| H | 39.072230862 | 25.684841954 | 30.087541026 |
| C | 41.773048500 | 24.295412871 | 32.516169660 |
| H | 40.604567506 | 22.469251255 | 32.510508690 |
| C | 41.876111937 | 25.603293141 | 32.028626768 |
| H | 40.983589776 | 27.105701105 | 30.754530184 |
| H | 42.528682541 | 23.903390903 | 33.198427739 |
| H | 42.714813473 | 26.234461400 | 32.324968997 |
| C | 19.436779204 | 30.439165190 | 31.403344692 |
| C | 19.758826494 | 31.549704544 | 30.597036907 |
| C | 18.131015967 | 30.357335988 | 31.930323414 |
| C | 18.813427335 | 32.539002657 | 30.328601874 |
| H | 20.747566954 | 31.618266246 | 30.141713881 |

|    |              |              |              |
|----|--------------|--------------|--------------|
| C  | 17.188726355 | 31.349926496 | 31.664351383 |
| H  | 17.866104166 | 29.502602391 | 32.553978771 |
| C  | 17.525511079 | 32.444773365 | 30.862369698 |
| H  | 19.083169569 | 33.385938945 | 29.696281754 |
| H  | 16.187211669 | 31.271703036 | 32.090714464 |
| H  | 16.790904135 | 33.223986868 | 30.657162858 |
| C  | 39.840561064 | 28.924460670 | 28.430208071 |
| C  | 38.980937340 | 28.335302707 | 27.478973760 |
| C  | 41.195599896 | 28.531530774 | 28.445521633 |
| C  | 39.460347955 | 27.372102700 | 26.591027702 |
| H  | 37.948468719 | 28.675179890 | 27.405842689 |
| C  | 41.667274307 | 27.556818287 | 27.568473747 |
| H  | 41.868339686 | 28.997318075 | 29.166688388 |
| C  | 40.800080074 | 26.970912413 | 26.639185430 |
| H  | 38.787942446 | 26.934049606 | 25.853143972 |
| H  | 42.713147000 | 27.249787224 | 27.610197346 |
| H  | 41.164541928 | 26.209870918 | 25.948109769 |
| C  | 21.729127945 | 38.976688808 | 34.984107159 |
| C  | 20.886899970 | 37.861003918 | 35.157509162 |
| C  | 21.519490873 | 40.103558251 | 35.802827730 |
| C  | 19.873760631 | 37.871347838 | 36.117234287 |
| H  | 20.980532174 | 36.997799160 | 34.501725569 |
| C  | 20.499573218 | 40.112993945 | 36.755690812 |
| H  | 22.159940210 | 40.976300640 | 35.679921148 |
| C  | 19.671993673 | 38.998278883 | 36.920952784 |
| H  | 19.230450878 | 36.995950375 | 36.217640389 |
| H  | 20.354220190 | 40.997732336 | 37.377522514 |
| H  | 18.874160617 | 39.009303740 | 37.664282295 |
| Ni | 40.664281701 | 33.457130301 | 27.127067905 |
| O  | 42.190455238 | 34.828460908 | 27.708124492 |
| H  | 42.961572508 | 34.415975209 | 27.216802496 |

|    |              |              |              |
|----|--------------|--------------|--------------|
| O  | 41.754843349 | 31.785156977 | 27.686771749 |
| H  | 41.572700842 | 31.167548405 | 26.940878426 |
| H  | 42.005296139 | 35.668423332 | 27.252560076 |
| H  | 41.284566107 | 31.349158454 | 28.486487734 |
| O  | 43.919235125 | 33.172061869 | 26.445626121 |
| H  | 43.555489721 | 33.047796207 | 25.547213964 |
| O  | 40.029371934 | 33.650657537 | 29.366185968 |
| H  | 40.802633072 | 34.097538220 | 29.754203154 |
| H  | 43.447570404 | 32.485817196 | 26.970767951 |
| H  | 40.070326781 | 32.716173000 | 29.691974048 |
| Ni | 22.060511924 | 39.108952949 | 32.191741151 |
| O  | 24.497748534 | 40.909819820 | 31.310484519 |
| H  | 23.693186732 | 40.791900649 | 30.758056074 |
| O  | 19.682693487 | 41.443404752 | 31.594208638 |
| H  | 20.023847608 | 42.056627276 | 32.268298262 |
| H  | 25.116344754 | 40.231097339 | 30.986864532 |
| H  | 19.340323218 | 40.649671207 | 32.114460820 |
| O  | 21.684451679 | 40.220083807 | 30.456371459 |
| H  | 20.890534150 | 40.781235528 | 30.787033467 |
| O  | 18.931289237 | 39.154295431 | 32.776884309 |
| H  | 19.046990158 | 39.084095165 | 33.743496344 |
| H  | 21.335084147 | 39.620722569 | 29.770628334 |
| H  | 19.599538376 | 38.511460733 | 32.422274311 |
| Ni | 20.550794882 | 26.980869319 | 29.997402683 |
| O  | 17.341787028 | 27.524635396 | 30.246921189 |
| H  | 18.176282847 | 27.852753561 | 30.670600704 |
| O  | 19.913370224 | 25.408006710 | 31.038631516 |
| H  | 19.544206431 | 25.756161731 | 31.873157778 |
| O  | 17.981083804 | 24.981973914 | 29.329132993 |
| H  | 18.633514060 | 25.098838546 | 28.606729060 |
| O  | 21.191765882 | 28.594810351 | 29.005944051 |

|    |              |              |              |
|----|--------------|--------------|--------------|
| H  | 21.560491974 | 29.217193552 | 29.674361040 |
| H  | 21.940557742 | 28.363833165 | 28.411717717 |
| H  | 19.115096946 | 25.078722707 | 30.488754655 |
| H  | 17.623173208 | 25.896044452 | 29.485261177 |
| H  | 16.981088704 | 28.303192323 | 29.790792294 |
| Ni | 40.081511774 | 21.185612735 | 28.783412689 |
| O  | 38.234925553 | 19.234115924 | 30.683435121 |
| H  | 37.933542979 | 19.049661780 | 29.774637496 |
| O  | 40.861537933 | 19.625136700 | 29.985572775 |
| H  | 40.993262307 | 18.958127075 | 29.255503664 |
| O  | 40.692340472 | 18.246750329 | 27.616174819 |
| H  | 40.035336889 | 18.964505259 | 27.396607589 |
| O  | 41.655343679 | 22.315586471 | 29.378880128 |
| H  | 42.159682897 | 21.644956186 | 29.882805766 |
| H  | 41.355313896 | 22.948350185 | 30.070113036 |
| H  | 41.405317771 | 18.372487933 | 26.967040521 |
| H  | 38.209978515 | 20.223818731 | 30.725057020 |
| H  | 40.012085058 | 19.327762132 | 30.423876318 |
| H  | 23.793203378 | 40.463378386 | 32.887518880 |

**\*3D-CPM-a\_2H:**

|   |              |              |              |
|---|--------------|--------------|--------------|
| C | 31.313353619 | 25.930402647 | 27.648765634 |
| C | 30.197195847 | 26.700210998 | 27.837471788 |
| C | 30.282809986 | 28.118713163 | 27.961982218 |
| C | 31.576804655 | 28.741352053 | 27.861626066 |
| C | 32.714220133 | 27.922371877 | 27.672764205 |
| C | 32.609284968 | 26.538543138 | 27.569607582 |
| C | 29.126169369 | 28.915981168 | 28.161908983 |
| C | 31.698168515 | 30.168027148 | 27.948851334 |
| C | 30.550556581 | 30.954858885 | 28.242169772 |
| C | 29.257997800 | 30.326846817 | 28.348011718 |

|   |              |              |              |
|---|--------------|--------------|--------------|
| C | 28.131386590 | 31.125043463 | 28.640789299 |
| H | 27.159954703 | 30.643959134 | 28.745650404 |
| C | 28.234388371 | 32.501881723 | 28.824474615 |
| C | 29.521678532 | 33.120507985 | 28.714210775 |
| C | 30.631661961 | 32.366182027 | 28.429253687 |
| H | 31.235966067 | 24.846139433 | 27.574069576 |
| H | 29.213524963 | 26.236028120 | 27.909239132 |
| H | 33.694996778 | 28.392210242 | 27.617848082 |
| H | 29.607102069 | 34.194583184 | 28.877073727 |
| H | 31.612040544 | 32.838180900 | 28.355912326 |
| C | 27.841188406 | 28.330670013 | 28.135720049 |
| C | 26.717830284 | 27.849713376 | 28.045004973 |
| C | 25.415475231 | 27.338748331 | 27.838607814 |
| C | 24.823619701 | 26.404720355 | 28.725214179 |
| C | 24.658450759 | 27.762703757 | 26.716441802 |
| C | 23.529899726 | 25.951069152 | 28.522830350 |
| H | 25.395872025 | 26.060638881 | 29.586892785 |
| C | 23.380426911 | 27.274113265 | 26.490632230 |
| H | 25.096977743 | 28.485996509 | 26.028850104 |
| C | 22.771010145 | 26.368263573 | 27.397138293 |
| H | 23.070494586 | 25.263145178 | 29.233336151 |
| H | 22.816540233 | 27.629793248 | 25.627884486 |
| C | 21.363915539 | 25.970771378 | 27.275574786 |
| O | 20.695568222 | 25.669692145 | 28.342431010 |
| C | 27.069843925 | 33.236893225 | 29.131032804 |
| C | 26.010182237 | 33.788038036 | 29.398547351 |
| C | 24.772644982 | 34.351674134 | 29.762221253 |
| C | 24.574621127 | 35.752259284 | 29.818756486 |
| C | 23.684734963 | 33.510305154 | 30.112418412 |
| C | 23.375229485 | 36.280672712 | 30.258896088 |
| H | 25.394652807 | 36.412473837 | 29.536737043 |

|   |              |              |              |
|---|--------------|--------------|--------------|
| C | 22.501629717 | 34.045748930 | 30.588523651 |
| H | 23.805933141 | 32.430310360 | 30.032185770 |
| C | 22.326748944 | 35.446064040 | 30.719114265 |
| H | 23.247626495 | 37.359742102 | 30.328560985 |
| H | 21.688852712 | 33.377036676 | 30.864957026 |
| C | 21.148324037 | 36.034491547 | 31.335834211 |
| O | 20.892928996 | 37.290974477 | 31.194086190 |
| C | 32.953064775 | 30.756587618 | 27.695058385 |
| C | 33.755496583 | 25.733307713 | 27.402500858 |
| C | 34.735273467 | 25.015197916 | 27.272483446 |
| C | 35.853516960 | 24.163705241 | 27.154670878 |
| C | 37.162088997 | 24.651693809 | 27.362845335 |
| C | 35.688319517 | 22.791338873 | 26.860031284 |
| C | 38.258276420 | 23.803336333 | 27.285233971 |
| H | 37.299383111 | 25.704189619 | 27.607817029 |
| C | 36.786676999 | 21.946679506 | 26.803055925 |
| H | 34.683487898 | 22.403383276 | 26.690542168 |
| C | 38.090663226 | 22.433520365 | 27.017005332 |
| H | 39.253115747 | 24.203387551 | 27.478553879 |
| H | 36.656221457 | 20.884162555 | 26.598740275 |
| C | 39.223763426 | 21.464906240 | 26.970167874 |
| O | 38.921029489 | 20.207586916 | 27.378530934 |
| C | 34.069614734 | 31.159240776 | 27.389345494 |
| C | 35.358777593 | 31.562345516 | 26.974830594 |
| C | 36.084853324 | 30.774477425 | 26.051730704 |
| C | 35.958915878 | 32.757569538 | 27.439238416 |
| C | 37.346916560 | 31.163482841 | 25.615794753 |
| H | 35.626457207 | 29.866714310 | 25.656839961 |
| C | 37.223058561 | 33.129308162 | 27.011979181 |
| H | 35.414629525 | 33.381231515 | 28.148765406 |
| C | 37.957102028 | 32.341043010 | 26.096603039 |

|   |              |              |              |
|---|--------------|--------------|--------------|
| H | 37.847427361 | 30.557597354 | 24.861978137 |
| H | 37.680298484 | 34.046983822 | 27.380197332 |
| C | 39.284961372 | 32.838898133 | 25.641700080 |
| O | 39.509917302 | 34.151115763 | 25.718642952 |
| C | 40.250878928 | 21.604438641 | 25.883529371 |
| C | 41.115340971 | 22.710344170 | 25.794368339 |
| C | 40.358380863 | 20.593676986 | 24.909840771 |
| C | 42.052746580 | 22.802037183 | 24.764710634 |
| H | 41.079996398 | 23.484134220 | 26.560378893 |
| C | 41.297091995 | 20.686587549 | 23.880437785 |
| H | 39.683084765 | 19.738568145 | 24.962516591 |
| C | 42.148618889 | 21.792895577 | 23.800635199 |
| H | 42.723822071 | 23.661928299 | 24.720380327 |
| H | 41.356117953 | 19.895909902 | 23.130454789 |
| H | 42.882260201 | 21.866951063 | 22.996990849 |
| C | 20.653672029 | 25.956570406 | 25.990045158 |
| C | 21.288227613 | 25.581208873 | 24.785195797 |
| C | 19.276101583 | 26.266061404 | 25.953671454 |
| C | 20.566434575 | 25.511088948 | 23.594595160 |
| H | 22.344393821 | 25.309852258 | 24.795929684 |
| C | 18.562354817 | 26.203119714 | 24.759965515 |
| H | 18.784083362 | 26.585016952 | 26.873162759 |
| C | 19.201856657 | 25.821376084 | 23.574536190 |
| H | 21.069473929 | 25.200982223 | 22.677483548 |
| H | 17.501026235 | 26.455745562 | 24.751015820 |
| H | 18.640602527 | 25.765837485 | 22.641239671 |
| C | 40.224677335 | 32.047658570 | 24.786039619 |
| C | 40.420308338 | 30.652111642 | 24.938932583 |
| C | 41.063037387 | 32.725776922 | 23.868392445 |
| C | 41.437582832 | 29.985074846 | 24.247738445 |
| H | 39.791311529 | 30.085037775 | 25.624348049 |

|   |              |              |              |
|---|--------------|--------------|--------------|
| C | 42.068629400 | 32.052849820 | 23.177370802 |
| H | 40.910071562 | 33.796761218 | 23.735288714 |
| C | 42.274817439 | 30.677752565 | 23.370208751 |
| H | 41.570239894 | 28.913929420 | 24.407980660 |
| H | 42.696419782 | 32.601779309 | 22.472276574 |
| H | 43.068482748 | 30.156355661 | 22.834413341 |
| C | 20.255464641 | 35.253857723 | 32.225962007 |
| C | 20.738958717 | 34.268491270 | 33.111885105 |
| C | 18.878763711 | 35.557037750 | 32.260440456 |
| C | 19.876760638 | 33.606054643 | 33.986342009 |
| H | 21.804984381 | 34.043474776 | 33.135556889 |
| C | 18.018723144 | 34.891627979 | 33.130876178 |
| H | 18.484585271 | 36.303984944 | 31.569309026 |
| C | 18.512314268 | 33.908444851 | 33.995670839 |
| H | 20.275877858 | 32.853245897 | 34.667310234 |
| H | 16.953917254 | 35.129145800 | 33.126723051 |
| H | 17.837309125 | 33.378476321 | 34.668254124 |
| C | 29.744268299 | 26.299334957 | 31.334791194 |
| C | 28.927897503 | 27.385219487 | 31.553082194 |
| C | 29.447955007 | 28.704345720 | 31.697717045 |
| C | 30.864123264 | 28.893783365 | 31.574963489 |
| C | 31.677811918 | 27.766971288 | 31.363755613 |
| C | 31.157779269 | 26.476119249 | 31.253003643 |
| C | 28.605937765 | 29.829956938 | 31.959019376 |
| C | 31.441308339 | 30.212754104 | 31.671098797 |
| C | 30.603537974 | 31.329018709 | 31.973517430 |
| C | 29.188949729 | 31.139539719 | 32.127054150 |
| C | 28.380659940 | 32.250460879 | 32.436660253 |
| H | 27.307627065 | 32.105268574 | 32.545909323 |
| C | 28.913223828 | 33.529869584 | 32.607005474 |
| C | 30.321226135 | 33.710896670 | 32.440627686 |

|   |              |              |              |
|---|--------------|--------------|--------------|
| C | 31.129109387 | 32.642519874 | 32.130575640 |
| H | 29.323292605 | 25.299249543 | 31.230933719 |
| H | 27.848071125 | 27.251131927 | 31.621221441 |
| H | 32.753199851 | 27.906714251 | 31.285256017 |
| H | 30.744778848 | 34.707591478 | 32.566604686 |
| H | 32.203048266 | 32.785326427 | 32.003736452 |
| C | 27.224230207 | 29.681114188 | 32.054646506 |
| C | 25.998106014 | 29.609336839 | 32.132012888 |
| C | 24.607964267 | 29.492841436 | 32.139863601 |
| C | 23.988712212 | 28.222381025 | 31.963145007 |
| C | 23.751018772 | 30.621964867 | 32.292725504 |
| C | 22.624335459 | 28.104694613 | 31.840762497 |
| H | 24.619332992 | 27.334897999 | 31.907686896 |
| C | 22.382406150 | 30.503596098 | 32.159921360 |
| H | 24.195586058 | 31.596376234 | 32.497372839 |
| C | 21.765435122 | 29.250216753 | 31.856235081 |
| H | 22.184111570 | 27.117288044 | 31.690304828 |
| H | 21.758458003 | 31.387411369 | 32.288815685 |
| C | 20.366522501 | 29.096856772 | 31.557012849 |
| O | 19.868299143 | 27.895414255 | 31.351468365 |
| C | 28.043455208 | 34.593854900 | 32.935246751 |
| C | 27.200353959 | 35.433858103 | 33.221085152 |
| C | 26.139717676 | 36.319474563 | 33.515625358 |
| C | 26.314953004 | 37.716176142 | 33.620397052 |
| C | 24.831140755 | 35.808974052 | 33.688469524 |
| C | 25.225534803 | 38.559997892 | 33.810483555 |
| H | 27.319890239 | 38.132840004 | 33.539115338 |
| C | 23.753745007 | 36.657406318 | 33.880223577 |
| H | 24.674712663 | 34.731175965 | 33.632658402 |
| C | 23.911129784 | 38.058125479 | 33.894327418 |
| H | 25.387530910 | 39.635403833 | 33.875272322 |

|   |              |              |              |
|---|--------------|--------------|--------------|
| H | 22.763481796 | 36.217541385 | 33.959900340 |
| C | 22.731486171 | 39.006535446 | 33.867785346 |
| O | 23.103212809 | 40.379601878 | 33.856360924 |
| C | 32.809464447 | 30.348561412 | 31.435118682 |
| C | 32.101897689 | 25.438487765 | 31.077041767 |
| C | 33.110929704 | 24.755863708 | 30.948436000 |
| C | 34.415826126 | 24.224544251 | 30.898233607 |
| C | 35.454864728 | 25.011103273 | 31.461435214 |
| C | 34.762238865 | 22.986713683 | 30.305672047 |
| C | 36.769241127 | 24.590193191 | 31.414320190 |
| H | 35.198779300 | 25.952469020 | 31.947359499 |
| C | 36.083258520 | 22.574007109 | 30.252850071 |
| H | 33.978179236 | 22.371866189 | 29.863564922 |
| C | 37.123958159 | 23.368680986 | 30.789241458 |
| H | 37.533718663 | 25.203165078 | 31.888932007 |
| H | 36.343309355 | 21.637050370 | 29.762778693 |
| C | 38.503939241 | 22.901771907 | 30.758142571 |
| O | 38.821575094 | 21.712555732 | 30.433735870 |
| C | 34.004807858 | 30.305946320 | 31.146225055 |
| C | 35.332714446 | 30.186187684 | 30.725813209 |
| C | 35.832811371 | 28.928567337 | 30.279530962 |
| C | 36.215929330 | 31.299468724 | 30.694658697 |
| C | 37.117454887 | 28.811292036 | 29.788931517 |
| H | 35.182533789 | 28.054476868 | 30.312205944 |
| C | 37.501442082 | 31.172099518 | 30.214146880 |
| H | 35.852304074 | 32.270022036 | 31.032431946 |
| C | 37.988274593 | 29.932695143 | 29.719741586 |
| H | 37.468978888 | 27.828803080 | 29.474856357 |
| H | 38.137625968 | 32.053297893 | 30.170358464 |
| C | 39.335883778 | 29.853241036 | 29.190531449 |
| O | 40.210921172 | 30.746966973 | 29.469191865 |

|   |              |              |              |
|---|--------------|--------------|--------------|
| C | 39.617372571 | 23.810022650 | 31.164663100 |
| C | 39.748321399 | 25.123359183 | 30.674850729 |
| C | 40.607654575 | 23.310093800 | 32.037352063 |
| C | 40.827657268 | 25.917810528 | 31.062396945 |
| H | 39.010781995 | 25.510902044 | 29.971810881 |
| C | 41.679414600 | 24.113523303 | 32.431804999 |
| H | 40.507612077 | 22.289062742 | 32.408889405 |
| C | 41.790325160 | 25.421080236 | 31.946410558 |
| H | 40.918146999 | 26.927787834 | 30.664448696 |
| H | 42.425060444 | 23.720411502 | 33.124371328 |
| H | 42.626085684 | 26.050191115 | 32.255091994 |
| C | 19.432086897 | 30.229365007 | 31.359524627 |
| C | 19.762966450 | 31.350422100 | 30.573278718 |
| C | 18.121962100 | 30.141316977 | 31.873226069 |
| C | 18.822598247 | 32.345860304 | 30.310346894 |
| H | 20.754943672 | 31.420537206 | 30.125691995 |
| C | 17.184513766 | 31.140718969 | 31.615094337 |
| H | 17.848997126 | 29.277714724 | 32.480440982 |
| C | 17.530091353 | 32.246725351 | 30.832006657 |
| H | 19.101120866 | 33.199327298 | 29.690915776 |
| H | 16.178375740 | 31.056316778 | 32.028629848 |
| H | 16.797975744 | 33.029185343 | 30.630817525 |
| C | 39.759594833 | 28.751004482 | 28.288414427 |
| C | 38.902555234 | 28.193244062 | 27.317794840 |
| C | 41.104588435 | 28.328356961 | 28.323706979 |
| C | 39.378043930 | 27.234449011 | 26.422227944 |
| H | 37.877674307 | 28.554390449 | 27.234793912 |
| C | 41.569468936 | 27.352525747 | 27.444566630 |
| H | 41.774492652 | 28.773980372 | 29.060168800 |
| C | 40.706758021 | 26.800442441 | 26.490061673 |
| H | 38.709633792 | 26.822799874 | 25.665622550 |

|    |              |              |              |
|----|--------------|--------------|--------------|
| H  | 42.607122060 | 27.020851106 | 27.502133690 |
| H  | 41.066164152 | 26.040860209 | 25.794593605 |
| C  | 21.690344229 | 38.827722269 | 34.955294018 |
| C  | 20.880405096 | 37.675931030 | 35.062903151 |
| C  | 21.452018243 | 39.872085891 | 35.870879955 |
| C  | 19.885250590 | 37.572150741 | 36.039030794 |
| H  | 20.989633464 | 36.861230814 | 34.350060371 |
| C  | 20.462471929 | 39.763223231 | 36.850228535 |
| H  | 22.055377486 | 40.774474255 | 35.800442698 |
| C  | 19.670250871 | 38.616484999 | 36.942278238 |
| H  | 19.272688327 | 36.670032119 | 36.076943449 |
| H  | 20.307857237 | 40.589318427 | 37.546495450 |
| H  | 18.890751484 | 38.540613708 | 37.701220360 |
| Ni | 40.614026149 | 33.308971907 | 26.980882323 |
| O  | 42.134011287 | 34.664687561 | 27.597763492 |
| H  | 42.911589556 | 34.252990253 | 27.114705582 |
| O  | 41.694811270 | 31.610352450 | 27.514238313 |
| H  | 41.503336292 | 31.004326578 | 26.760852451 |
| H  | 41.959243405 | 35.510231640 | 27.148340530 |
| H  | 41.233361472 | 31.169402158 | 28.312118860 |
| O  | 43.879195232 | 33.017321082 | 26.349273494 |
| H  | 43.541680752 | 32.906666433 | 25.438853947 |
| O  | 39.982710851 | 33.466202444 | 29.230775659 |
| H  | 40.755580085 | 33.918501179 | 29.613469221 |
| H  | 43.392846260 | 32.321507955 | 26.848632863 |
| H  | 40.036304100 | 32.529500508 | 29.548198003 |
| Ni | 21.815406160 | 38.866689326 | 32.142437163 |
| O  | 24.015515462 | 41.192660517 | 31.321814555 |
| H  | 23.215530566 | 40.875464897 | 30.843584033 |
| O  | 19.379179120 | 41.530941386 | 31.408982469 |
| H  | 19.704225272 | 42.278638102 | 31.939817009 |

|    |              |              |              |
|----|--------------|--------------|--------------|
| H  | 24.710276099 | 40.572898074 | 31.038069756 |
| H  | 19.297449146 | 40.779785916 | 32.044443841 |
| O  | 21.423920262 | 40.180718134 | 30.326032616 |
| H  | 20.643532992 | 40.767600834 | 30.560296722 |
| O  | 19.726296451 | 39.086444472 | 32.695351997 |
| H  | 19.681553439 | 38.827390362 | 33.643474665 |
| H  | 21.160005809 | 39.640030080 | 29.561211758 |
| H  | 19.621883609 | 38.236084058 | 32.190545570 |
| Ni | 20.549541444 | 26.784780346 | 29.900190247 |
| O  | 17.334489704 | 27.405085116 | 30.140503551 |
| H  | 18.176044330 | 27.703841465 | 30.571522228 |
| O  | 19.884570966 | 25.201897811 | 30.924633636 |
| H  | 19.526029384 | 25.548853010 | 31.764081963 |
| O  | 17.922848156 | 24.838086501 | 29.223772957 |
| H  | 18.561246286 | 24.942199660 | 28.488114905 |
| O  | 21.192413512 | 28.405904423 | 28.919699343 |
| H  | 21.556108265 | 29.031027499 | 29.587371113 |
| H  | 21.943020636 | 28.179511934 | 28.326394379 |
| H  | 19.076850721 | 24.900574848 | 30.374476693 |
| H  | 17.582297312 | 25.758180642 | 29.382856701 |
| H  | 16.998587077 | 28.197171548 | 29.689218307 |
| Ni | 40.033194254 | 21.035592195 | 28.637471120 |
| O  | 38.181577501 | 19.084715660 | 30.587512282 |
| H  | 37.838774194 | 18.847389325 | 29.706852512 |
| O  | 40.783489914 | 19.461016538 | 29.845408397 |
| H  | 40.922114830 | 18.792794908 | 29.118276607 |
| O  | 40.663872198 | 18.072049278 | 27.467863567 |
| H  | 40.026501493 | 18.800297890 | 27.224890544 |
| O  | 41.598088926 | 22.156133894 | 29.280670114 |
| H  | 42.089506013 | 21.471866795 | 29.779171835 |
| H  | 41.290235560 | 22.777161548 | 29.978936349 |

|   |              |              |              |
|---|--------------|--------------|--------------|
| H | 41.397624798 | 18.177513337 | 26.838856904 |
| H | 38.143505239 | 20.075459640 | 30.586118194 |
| H | 39.931303344 | 19.166753339 | 30.282226427 |
| H | 23.549866254 | 40.598418538 | 32.996852398 |
| H | 23.163582807 | 38.656679062 | 31.683849803 |

**\*3D-CPM-a + H<sub>2</sub>:**

|   |              |              |              |
|---|--------------|--------------|--------------|
| C | 31.342071064 | 26.011723753 | 27.774836598 |
| C | 30.207320410 | 26.758933085 | 27.945868140 |
| C | 30.262517802 | 28.177049554 | 28.085297461 |
| C | 31.547862812 | 28.823605174 | 28.015703827 |
| C | 32.705837890 | 28.026308010 | 27.854112658 |
| C | 32.629575908 | 26.641433743 | 27.737131346 |
| C | 29.085945953 | 28.950816508 | 28.270333383 |
| C | 31.637774270 | 30.252702733 | 28.099806309 |
| C | 30.468719444 | 31.017806265 | 28.367334245 |
| C | 29.187302728 | 30.365552300 | 28.459299646 |
| C | 28.043378455 | 31.142633311 | 28.752931461 |
| H | 27.082389811 | 30.640922744 | 28.858699869 |
| C | 28.122462421 | 32.519207567 | 28.954895796 |
| C | 29.397428822 | 33.163977481 | 28.838045440 |
| C | 30.520460247 | 32.431526908 | 28.549720455 |
| H | 31.286241824 | 24.927201487 | 27.686796572 |
| H | 29.232261074 | 26.274021570 | 27.992229210 |
| H | 33.678355278 | 28.514670145 | 27.828114027 |
| H | 29.462133170 | 34.238988664 | 29.003030441 |
| H | 31.491482656 | 32.922481132 | 28.477187083 |
| C | 27.812531118 | 28.338656466 | 28.232791883 |
| C | 26.699512157 | 27.834476479 | 28.138794085 |
| C | 25.407655066 | 27.295528123 | 27.930547287 |
| C | 24.818709231 | 26.376016036 | 28.833264915 |

|   |              |              |              |
|---|--------------|--------------|--------------|
| C | 24.654297694 | 27.682534425 | 26.792814173 |
| C | 23.533896438 | 25.897345204 | 28.628776137 |
| H | 25.386145037 | 26.060947145 | 29.708883480 |
| C | 23.384408792 | 27.173292401 | 26.567895640 |
| H | 25.088639301 | 28.394842728 | 26.091157924 |
| C | 22.778917174 | 26.276888921 | 27.486818416 |
| H | 23.079631960 | 25.217141419 | 29.349990991 |
| H | 22.824538129 | 27.503723878 | 25.692530270 |
| C | 21.383692747 | 25.843232206 | 27.349425594 |
| O | 20.701287719 | 25.531860120 | 28.404319530 |
| C | 26.958117775 | 33.236526873 | 29.309680814 |
| C | 25.924954352 | 33.801240843 | 29.646566060 |
| C | 24.724052868 | 34.377932398 | 30.107212068 |
| C | 24.626333477 | 35.755036876 | 30.427846930 |
| C | 23.575554752 | 33.567270774 | 30.301145264 |
| C | 23.466584475 | 36.273816596 | 30.977556088 |
| H | 25.490339584 | 36.400186285 | 30.274782861 |
| C | 22.423289853 | 34.091157835 | 30.859936288 |
| H | 23.620394962 | 32.513621100 | 30.026186402 |
| C | 22.347548907 | 35.452660185 | 31.250729934 |
| H | 23.429065482 | 37.332485102 | 31.252868752 |
| H | 21.556763872 | 33.445652634 | 30.991575856 |
| C | 21.146269336 | 35.986844769 | 31.882704087 |
| O | 20.897862644 | 37.245451887 | 31.949043332 |
| C | 32.886360416 | 30.860674174 | 27.863080510 |
| C | 33.789571263 | 25.849985604 | 27.588489835 |
| C | 34.767357249 | 25.126601664 | 27.466309539 |
| C | 35.880550832 | 24.267885477 | 27.339538814 |
| C | 37.193464914 | 24.737714890 | 27.562772918 |
| C | 35.707214036 | 22.905280770 | 27.004158302 |
| C | 38.283194186 | 23.884422473 | 27.456657841 |

|   |              |              |              |
|---|--------------|--------------|--------------|
| H | 37.340743397 | 25.782951029 | 27.829703110 |
| C | 36.797850256 | 22.052985186 | 26.926919109 |
| H | 34.700226240 | 22.530799696 | 26.818846316 |
| C | 38.106374801 | 22.523225897 | 27.152954084 |
| H | 39.282601743 | 24.276259269 | 27.640794565 |
| H | 36.660757215 | 20.997787640 | 26.692021962 |
| C | 39.234678437 | 21.552612173 | 27.068226699 |
| O | 38.905508846 | 20.265853833 | 27.324221395 |
| C | 34.003669375 | 31.261641482 | 27.559636404 |
| C | 35.294185725 | 31.634782312 | 27.121730041 |
| C | 35.981690443 | 30.815452193 | 26.195716818 |
| C | 35.932820994 | 32.819634872 | 27.560448791 |
| C | 37.242819983 | 31.167418576 | 25.727391184 |
| H | 35.492896051 | 29.914256161 | 25.823592339 |
| C | 37.195534030 | 33.154202796 | 27.101007340 |
| H | 35.419712182 | 33.464879639 | 28.273902367 |
| C | 37.888848686 | 32.336768495 | 26.179491070 |
| H | 37.714775585 | 30.540055852 | 24.972648673 |
| H | 37.682827823 | 34.064535728 | 27.447329665 |
| C | 39.225192457 | 32.791276448 | 25.705007621 |
| O | 39.494794683 | 34.096224832 | 25.785206066 |
| C | 40.333470697 | 21.790966128 | 26.070402666 |
| C | 41.274865295 | 22.826879230 | 26.201878737 |
| C | 40.434662932 | 20.931216993 | 24.960680824 |
| C | 42.282060948 | 22.997989616 | 25.251159821 |
| H | 41.247646314 | 23.469829576 | 27.081034611 |
| C | 41.445289382 | 21.101019224 | 24.013348130 |
| H | 39.704849592 | 20.128030364 | 24.849383310 |
| C | 42.374328344 | 22.136436691 | 24.153062538 |
| H | 43.015300424 | 23.796642775 | 25.379642673 |
| H | 41.504396128 | 20.425216840 | 23.158353220 |

|   |              |              |              |
|---|--------------|--------------|--------------|
| H | 43.167922670 | 22.267202867 | 23.416536351 |
| C | 20.690701882 | 25.802738733 | 26.055153431 |
| C | 21.346511182 | 25.424739178 | 24.863374536 |
| C | 19.308229958 | 26.088321526 | 26.002510900 |
| C | 20.641499468 | 25.331414465 | 23.665451770 |
| H | 22.406725732 | 25.171249336 | 24.891063838 |
| C | 18.611296555 | 26.004947641 | 24.800683120 |
| H | 18.801409311 | 26.404461309 | 26.915057172 |
| C | 19.273418691 | 25.623679572 | 23.626925328 |
| H | 21.159443440 | 25.020483537 | 22.756961479 |
| H | 17.546798594 | 26.242314941 | 24.774215130 |
| H | 18.725120608 | 25.553653526 | 22.686719941 |
| C | 40.128900386 | 31.977860481 | 24.829749346 |
| C | 40.304211550 | 30.580075001 | 24.976275373 |
| C | 40.956648866 | 32.644031738 | 23.895638421 |
| C | 41.292775608 | 29.897119355 | 24.258975199 |
| H | 39.681194564 | 30.022871181 | 25.674937612 |
| C | 41.931868574 | 31.956221869 | 23.177099946 |
| H | 40.822892794 | 33.718658317 | 23.771950674 |
| C | 42.118761649 | 30.578036256 | 23.361990959 |
| H | 41.413133775 | 28.823877973 | 24.414439820 |
| H | 42.551986233 | 32.496814669 | 22.459101620 |
| H | 42.890022019 | 30.044725269 | 22.805517109 |
| C | 20.153668507 | 35.101497139 | 32.537538480 |
| C | 20.561929242 | 33.991988976 | 33.305317083 |
| C | 18.788051348 | 35.445552989 | 32.522267489 |
| C | 19.629787235 | 33.242374083 | 34.022321485 |
| H | 21.621373565 | 33.743620482 | 33.369818997 |
| C | 17.859653295 | 34.690620096 | 33.234129771 |
| H | 18.461876620 | 36.309951778 | 31.944120983 |
| C | 18.276402174 | 33.586303120 | 33.986164825 |

|   |              |              |              |
|---|--------------|--------------|--------------|
| H | 19.963923549 | 32.389909871 | 34.614960768 |
| H | 16.804126513 | 34.963937424 | 33.202565355 |
| H | 17.547662963 | 32.992139266 | 34.538305005 |
| C | 29.750819387 | 26.188496202 | 31.430044749 |
| C | 28.930230853 | 27.271239181 | 31.650620142 |
| C | 29.444823218 | 28.591479305 | 31.800349103 |
| C | 30.860958353 | 28.783661475 | 31.679592199 |
| C | 31.679354409 | 27.660067984 | 31.466560263 |
| C | 31.164602246 | 26.367431346 | 31.350655517 |
| C | 28.596796719 | 29.714388924 | 32.061680177 |
| C | 31.433746481 | 30.104474244 | 31.776332868 |
| C | 30.591030842 | 31.218676119 | 32.075922495 |
| C | 29.176716799 | 31.025575247 | 32.233193633 |
| C | 28.368440695 | 32.137185084 | 32.548238398 |
| H | 27.296233725 | 31.990596712 | 32.665635548 |
| C | 28.900401823 | 33.418016646 | 32.706493494 |
| C | 30.305292656 | 33.603309824 | 32.527609127 |
| C | 31.113755458 | 32.533971759 | 32.222813435 |
| H | 29.331974639 | 25.187808742 | 31.323466436 |
| H | 27.851053528 | 27.132495342 | 31.717344478 |
| H | 32.754273173 | 27.804041646 | 31.391135801 |
| H | 30.726915511 | 34.601854726 | 32.644010919 |
| H | 32.186811815 | 32.678562469 | 32.091142522 |
| C | 27.214424033 | 29.556733954 | 32.147002111 |
| C | 25.988371000 | 29.464204447 | 32.207816922 |
| C | 24.598066449 | 29.339524935 | 32.208418552 |
| C | 23.979945348 | 28.065365292 | 32.053195658 |
| C | 23.739745676 | 30.471607275 | 32.336161879 |
| C | 22.615475421 | 27.944399868 | 31.929839971 |
| H | 24.611306476 | 27.177627844 | 32.016075628 |
| C | 22.370636211 | 30.348231835 | 32.211937201 |

|   |              |              |              |
|---|--------------|--------------|--------------|
| H | 24.183260580 | 31.451015565 | 32.517974757 |
| C | 21.753793409 | 29.088021395 | 31.931376639 |
| H | 22.176038350 | 26.955301117 | 31.793165568 |
| H | 21.747695951 | 31.234552978 | 32.325105839 |
| C | 20.353826323 | 28.923849388 | 31.640431280 |
| O | 19.858324231 | 27.718195566 | 31.439057310 |
| C | 28.037121374 | 34.490247352 | 33.035228219 |
| C | 27.212146404 | 35.349486414 | 33.314600653 |
| C | 26.175513095 | 36.268418875 | 33.600819684 |
| C | 26.171116402 | 37.581893374 | 33.074853914 |
| C | 25.066663612 | 35.867233608 | 34.380354954 |
| C | 25.068154237 | 38.407980427 | 33.233897890 |
| H | 27.031145278 | 37.929481535 | 32.501506093 |
| C | 23.980008029 | 36.711880785 | 34.565135292 |
| H | 25.070441484 | 34.875351762 | 34.833093880 |
| C | 23.924875617 | 37.979288139 | 33.945871114 |
| H | 25.068273141 | 39.391624307 | 32.768342655 |
| H | 23.156231219 | 36.370389765 | 35.187670954 |
| C | 22.695818799 | 38.820062839 | 33.949412808 |
| O | 22.735314237 | 40.019521973 | 33.338647282 |
| C | 32.802282941 | 30.243309737 | 31.546180920 |
| C | 32.109194165 | 25.328954231 | 31.173867057 |
| C | 33.107852575 | 24.629935385 | 31.046443904 |
| C | 34.404030917 | 24.073652421 | 31.002214629 |
| C | 35.452385528 | 24.844999293 | 31.568993184 |
| C | 34.739391980 | 22.830384456 | 30.413038671 |
| C | 36.761754388 | 24.410670118 | 31.525191590 |
| H | 35.206331177 | 25.789326087 | 32.054306657 |
| C | 36.056963553 | 22.402756886 | 30.362665133 |
| H | 33.950191673 | 22.224025473 | 29.968208058 |
| C | 37.108009453 | 23.186916908 | 30.897879019 |

|   |              |              |              |
|---|--------------|--------------|--------------|
| H | 37.531361811 | 25.015975308 | 32.001028682 |
| H | 36.308964810 | 21.464846087 | 29.869126392 |
| C | 38.485809313 | 22.718935303 | 30.862863507 |
| O | 38.801501882 | 21.526880812 | 30.529199232 |
| C | 33.999840030 | 30.202106835 | 31.266078593 |
| C | 35.330407393 | 30.085315183 | 30.855177240 |
| C | 35.827688894 | 28.834950518 | 30.384577291 |
| C | 36.218095631 | 31.196058542 | 30.854084227 |
| C | 37.111584485 | 28.725444207 | 29.891424164 |
| H | 35.175179912 | 27.962063621 | 30.398414364 |
| C | 37.502918169 | 31.075892416 | 30.370529617 |
| H | 35.857707391 | 32.159008058 | 31.215862370 |
| C | 37.983365915 | 29.847087994 | 29.842857403 |
| H | 37.462034384 | 27.749840448 | 29.556011449 |
| H | 38.143048783 | 31.955127058 | 30.348157058 |
| C | 39.322986499 | 29.773695734 | 29.296896802 |
| O | 40.202128577 | 30.664815971 | 29.570336912 |
| C | 39.601221922 | 23.624106302 | 31.269699067 |
| C | 39.741570375 | 24.933371521 | 30.772654482 |
| C | 40.587475551 | 23.126597368 | 32.148532440 |
| C | 40.827270652 | 25.722986377 | 31.152542398 |
| H | 39.005187233 | 25.321356590 | 30.069085998 |
| C | 41.665888397 | 23.925355411 | 32.536645677 |
| H | 40.477088144 | 22.112882511 | 32.537599881 |
| C | 41.788370549 | 25.226881447 | 32.038902114 |
| H | 40.924468953 | 26.729090599 | 30.745495441 |
| H | 42.407429931 | 23.532420553 | 33.233842081 |
| H | 42.629736939 | 25.851839232 | 32.340432773 |
| C | 19.414448864 | 30.051888850 | 31.441863620 |
| C | 19.744707088 | 31.178926659 | 30.663269362 |
| C | 18.099652382 | 29.952475794 | 31.941490402 |

|    |              |              |              |
|----|--------------|--------------|--------------|
| C  | 18.798092608 | 32.165441795 | 30.390630374 |
| H  | 20.741197486 | 31.260921293 | 30.227558274 |
| C  | 17.155483022 | 30.942735188 | 31.672398080 |
| H  | 17.827800854 | 29.085082036 | 32.544227242 |
| C  | 17.499896399 | 32.053165451 | 30.894869928 |
| H  | 19.072694568 | 33.022676198 | 29.774290499 |
| H  | 16.145963122 | 30.849546200 | 32.076589956 |
| H  | 16.762955172 | 32.829117549 | 30.686476627 |
| C  | 39.737288661 | 28.680168542 | 28.378937725 |
| C  | 38.878518702 | 28.153383411 | 27.392985583 |
| C  | 41.074459381 | 28.234125901 | 28.418737787 |
| C  | 39.344556627 | 27.199903463 | 26.486849912 |
| H  | 37.858957402 | 28.529955551 | 27.311632174 |
| C  | 41.527482255 | 27.262936315 | 27.528354193 |
| H  | 41.746337604 | 28.657265424 | 29.166544450 |
| C  | 40.663861399 | 26.741365530 | 26.558276729 |
| H  | 38.673773646 | 26.809397117 | 25.721469841 |
| H  | 42.558094527 | 26.910660696 | 27.589844074 |
| H  | 41.014062233 | 25.980662805 | 25.859452526 |
| C  | 21.626609868 | 38.672226749 | 34.995119931 |
| C  | 20.926818751 | 37.471776725 | 35.221495070 |
| C  | 21.237192291 | 39.812646551 | 35.723924735 |
| C  | 19.865300947 | 37.416311884 | 36.126704645 |
| H  | 21.165876158 | 36.584075943 | 34.640538601 |
| C  | 20.175248718 | 39.758632359 | 36.627313900 |
| H  | 21.773157034 | 40.747477438 | 35.559594188 |
| C  | 19.478366321 | 38.562345575 | 36.830619495 |
| H  | 19.326737251 | 36.476862303 | 36.261475110 |
| H  | 19.888819818 | 40.657652198 | 37.175353266 |
| H  | 18.645679224 | 38.522611166 | 37.534095182 |
| Ni | 40.521997798 | 33.214035181 | 27.077759947 |

|    |              |              |              |
|----|--------------|--------------|--------------|
| O  | 42.089305888 | 34.536416160 | 27.700886002 |
| H  | 42.860063822 | 34.116875609 | 27.214119019 |
| O  | 41.618481686 | 31.505909795 | 27.566142675 |
| H  | 41.404469481 | 30.899761033 | 26.819978655 |
| H  | 41.933283082 | 35.391725124 | 27.263184969 |
| H  | 41.187382412 | 31.067007826 | 28.383169414 |
| O  | 43.816984312 | 32.880806225 | 26.442669901 |
| H  | 43.503711755 | 32.793399732 | 25.521722764 |
| O  | 39.975060548 | 33.365618265 | 29.321704489 |
| H  | 40.765539125 | 33.814148122 | 29.672379604 |
| H  | 43.297966530 | 32.191100063 | 26.918785333 |
| H  | 40.027555422 | 32.431677759 | 29.648648900 |
| Ni | 21.868492142 | 38.814747844 | 32.191480421 |
| O  | 24.153573508 | 41.154619848 | 31.029142908 |
| H  | 23.407932231 | 40.951109508 | 30.437056022 |
| O  | 20.013274812 | 41.305982214 | 32.492341789 |
| H  | 20.801477061 | 41.246970025 | 33.074108466 |
| H  | 23.797700884 | 40.885776641 | 31.901440884 |
| H  | 19.444739149 | 40.551750783 | 32.810948609 |
| O  | 21.281792743 | 40.020064095 | 30.616546613 |
| H  | 20.692584992 | 40.636105568 | 31.185750237 |
| O  | 18.661796166 | 38.955976078 | 33.173945597 |
| H  | 18.657461329 | 38.835805467 | 34.143069504 |
| H  | 20.699473295 | 39.590360321 | 29.966213128 |
| H  | 19.346703089 | 38.316608172 | 32.877128018 |
| Ni | 20.504570811 | 26.639432935 | 29.951622663 |
| O  | 17.322589928 | 27.132432896 | 30.245543483 |
| H  | 18.152477367 | 27.474533274 | 30.666073774 |
| O  | 19.917716061 | 25.043713384 | 31.000495205 |
| H  | 19.551110468 | 25.386594886 | 31.838232110 |
| O  | 17.971504869 | 24.593595033 | 29.314612825 |

|    |              |              |              |
|----|--------------|--------------|--------------|
| H  | 18.596116169 | 24.714625717 | 28.569927134 |
| O  | 21.118962360 | 28.279657968 | 28.980590403 |
| H  | 21.478502651 | 28.894835582 | 29.660056176 |
| H  | 21.874080672 | 28.061416298 | 28.389952295 |
| H  | 19.120704224 | 24.700673187 | 30.458683050 |
| H  | 17.603908440 | 25.502618335 | 29.475161407 |
| H  | 16.926042268 | 27.910406317 | 29.819532659 |
| Ni | 39.936484906 | 20.937165233 | 28.735331048 |
| O  | 38.336306298 | 18.943274523 | 31.166557205 |
| H  | 37.650771315 | 18.511792186 | 30.629684287 |
| O  | 40.667136576 | 19.251819347 | 29.796058115 |
| H  | 40.739631039 | 18.617010676 | 29.028533268 |
| O  | 40.554311766 | 18.063788559 | 27.345753134 |
| H  | 39.963860617 | 18.834714930 | 27.116268163 |
| O  | 41.604447601 | 21.866681956 | 29.488193995 |
| H  | 41.975592616 | 21.078670203 | 29.937841508 |
| H  | 41.361348900 | 22.469983283 | 30.226155357 |
| H  | 41.336576521 | 18.180467105 | 26.780231830 |
| H  | 38.234550961 | 19.912466669 | 30.979075071 |
| H  | 39.891965622 | 18.942857351 | 30.347847231 |
| H  | 24.608080919 | 41.885352219 | 35.239176334 |
| H  | 24.202177202 | 41.518929030 | 34.721556727 |

## 9. Literature Survey

**Table S4 State-of-the-art in electrochemical hydrogen evolution reaction from Ni-based electrocatalysts depicting best reported overpotentials.**

| Entry                 | Catalyst                                                                                               | Electrolyte                          | Overpotential (mV Vs RHE) | Current density (mA/cm <sup>2</sup> ) | Tafel slope (mV/dec) | References |
|-----------------------|--------------------------------------------------------------------------------------------------------|--------------------------------------|---------------------------|---------------------------------------|----------------------|------------|
| 1                     | a-Co/c-Ni@CP-600s                                                                                      | 1 M KOH                              | 41                        | -10                                   | 41.3                 | [1]        |
| 2                     | CoSe <sub>2</sub> @NiFe-LDH/NF                                                                         | 1 M KOH                              | 227                       | -50                                   | 64.5                 | [2]        |
| 3                     | Ru-NiAlEO-P/CFP                                                                                        | 1 M KOH                              | 60                        | -10                                   | 64.6                 | [3]        |
| 4                     | Te-Cu <sub>2</sub> O/NiMo                                                                              | 1 M KOH                              | 140                       | -10                                   | 136.7                | [4]        |
| 5                     | NiCoW/Ti <sub>3</sub> C <sub>2</sub> MXene                                                             | 1 M KOH                              | 107                       | -100                                  | 19.6                 | [5]        |
| 6                     | Ni(OH) <sub>2</sub> (NHCo)                                                                             | 1 M KOH                              | 73                        | -10                                   | 85                   | [6]        |
| 7                     | NiIr(OH) <sub>2</sub> -EO                                                                              | 1 M KOH                              | 69                        | -100                                  | 40                   | [7]        |
| 8                     | (Pt@Ni(OH) <sub>2</sub> -NF                                                                            | 1 M KOH                              | 53                        | -100                                  | 27                   | [8]        |
| 9                     | N-doped 3D porous Ni/C                                                                                 | 1 M KOH                              | 94                        | -100                                  | 52                   | [9]        |
| 10                    | Ni-Mo Alloy Nanosheet                                                                                  | 1 M KOH                              | 35                        | -10                                   | 45                   | [10]       |
| 11                    | NiMo alloy nanowire                                                                                    | 1 M KOH                              | 98                        | -400                                  | 43                   | [11]       |
| 12                    | Pt/Ni ASs                                                                                              | 1 M KOH                              | 28                        | -10                                   | 48                   | [12]       |
| Coordination Polymers |                                                                                                        |                                      |                           |                                       |                      |            |
| 13                    | [Ni <sub>2</sub> (cis-1,4 chdc) <sub>2</sub> (4,4'-bpy) <sub>3</sub> (H <sub>2</sub> O) <sub>2</sub> ] | 1 M KOH                              | 427                       | -10                                   | 361                  | [13]       |
| 14                    | W-doped Ni C <sub>3</sub> S <sub>3</sub> N <sub>3</sub>                                                | 1 M KOH                              | 88                        | -10                                   | 30                   | [14]       |
| 15                    | Mo-doped Ni C <sub>3</sub> S <sub>3</sub> N <sub>3</sub>                                               | 1 M KOH                              | 116                       | -10                                   | 89                   | [15]       |
| 16                    | Co <sub>1/3</sub> Ni <sub>2/3</sub> -DHBQ s                                                            | 1 M KOH                              | 177                       | -10                                   | 119                  | [16]       |
| 17                    | (NiCP-1/GCE)                                                                                           | 0.5 M H <sub>2</sub> SO <sub>4</sub> | 632                       | -10                                   | 159                  | [17]       |
| 18                    | 2D Ni-CP                                                                                               | 1 M KOH                              | 266                       | -10                                   | 186                  | [18]       |
| 19                    | <b>3D-CPM-a</b>                                                                                        | 0.5 M H <sub>2</sub> SO <sub>4</sub> | 94 ± 14                   | -100                                  | 55                   | This work  |

## 10. References

1. P. Zhang, J. Zhang, Y. Kong, S. Chen, D. Pan, B. Wang, D. Fan and X. Li, *ACS Applied Energy Materials*, 2025.
2. C. Yue, Z. Liang, Y. Xu, Q. Liu, Q. Wei, D. Yang, J. Du, W. Yang and Q. Shi, *Journal of colloid and interface science*, 2025, **699**, 138252.
3. Y. Yin, Y. Zhu, L. Qian, F. Wang, Z. Yuan, Y. Dai, T. Zhang, D. Yang and F. Qiu, *Fuel*, 2025, **398**, 135609.
4. W. Wang, W. Yang, X. Yu, T. Long, S. Deng, Q. Bian, Q. Ji and Y. Guo, *International Journal of Hydrogen Energy*, 2025, **148**, 150035.
5. S. R. Patil, R. Kulkarni, S. H. Talib, S. B. Ghode, Q. M. Saqib, M. Noman, C. S. Patil, J. Kim, Y. Ko, T. D. Dongale, A. Al Ghaferi, N. R. Chodankar, Y.-Y. Chang, J. R. Koduru and J. Bae, *Journal of Power Sources*, 2025, **652**, 237675.
6. A. R. Manchuri, K. C. Devarayapalli, B. Kim, Y. Lim and D. S. Lee, *Green Energy & Environment*, 2025, **10**, 854-868.
7. Z. Lin, Q. Gao, C. Lin, X. Liu, Q. Zhang and P. Diao, *Applied Catalysis B: Environment and Energy*, 2025, **378**, 125641.
8. X. He, B. Deng, J. Lang, Z. Zheng, Z. Zhang, H. Chang, Y. Wu, C. Yang, W. Zhao, M. Lei, H. Liu, K. Huang and H. Wu, *Nano Letters*, 2025, **25**, 6780-6787.
9. J. Ding, S. Ji, H. Wang, V. Linkov, H. Gai, F. Liu, Q. Liu and R. Wang, *ACS Sustainable Chemistry & Engineering*, 2019, **7**, 3974-3981.
10. Q. Zhang, P. Li, D. Zhou, Z. Chang, Y. Kuang and X. Sun, *Small*, 2017, **13**, 1701648.
11. A. Nairan, P. Zou, C. Liang, J. Liu, D. Wu, P. Liu and C. Yang, *Advanced Functional Materials*, 2019, **29**, 1903747.
12. J. Ding, Y. Ji, Y. Li and G. Hong, *Nano Letters*, 2021, **21**, 9381-9387.
13. S. Naaz, T. Chatterjee, S. Roy, B. Dutta, S. M. Wabaidur, M. R. Siddiqui, M. Wahid, S. Mafiz Alam and M. Hedayetullah Mir, *Chemistry – An Asian Journal*, 2024, **19**, e202400218.
14. M. Liu, W. Zou, S. Qiu, N. Su, J. Cong and L. Hou, *Advanced Functional Materials*, 2024, **34**, 2310155.
15. M. Liu, W. Zou, J. Cong, N. Su, S. Qiu and L. Hou, *Small*, 2023, **19**, 2302698.
16. J. Du, X. Liu, Y. Wu, X. Wei, Z. Wu, J. Jia, H. Li, B. Li and K. Wu, *Journal of Materials Chemistry C*, 2025, **13**, 14982-14990.
17. Z. Dou, Y. Xie, J. Teng, R. Gao, Y. Ma and H. Wu, *Journal of Molecular Structure*, 2025, **1344**, 142977.
18. M. M. Abdel Naby, M. B. Zakaria, H. M. El-Bery, G. G. Mohamed and M. E. El-Khouly, *Journal of Materials Chemistry A*, 2023, **11**, 24261-24271.
